# Supplementary material for: Vouchers for scaling up insecticide-treated nets in Tanzania: Methods for monitoring and evaluation of a national health system intervention
Source: PubMed Central journal article supplement (PMC2442068; doi:10.1186/1471-2458-8-205), 2008-06-10
Supplement: 1471-2458-8-205-S1.pdf [file 1471-2458-8-205-S1.pdf]

**Tanzania National Voucher Scheme for insecticide treated nets  
HOUSEHOLD SURVEY**

**Ifakara Health Research and Development Centre *in collaboration with*  
Ministry of Health, Tanzania and London School of Hygiene and Tropical  
Medicine**

**Module 1. Household questionnaire**

|     |                          |                                        |
|-----|--------------------------|----------------------------------------|
| H1  | District:<br>(drop down) | _ <br>district                         |
| H3  | Ward (drop down)         | _ _ _ _ _ _ _ _ _ _ _ _ _ _ <br>ward   |
| H5  | Sub village (drop down)  | _ _ _ _ _ _ _ _ _ _ _ _ _ _            |
| H6  | Cluster no               | _ _ <br>cluster                        |
| H7  | Household no             | _ _ <br>hhno                           |
| H8  | Interviewer initials     | _ _ <br>int                            |
| H9  | Date (dd/mm/yyyy)        | _ _ / _ _ / _ _ _ _ <br>date           |
| H10 | Name of household head   | _ _ _ _ _ _ _ _ _ _ _ _ _ _ <br>hhname |

|     |                                                                             |                   |
|-----|-----------------------------------------------------------------------------|-------------------|
| H11 | <b>Have you read him/her the consent form?</b><br>1= yes<br>2=no            | _ <br>readconsent |
| H12 | Does the respondent agree?<br>1=Yes<br>2=No <b>IF NO END INTERVIEW HERE</b> | _ <br>respagree   |
| H13 | Who is the respondent?<br>1=Household head<br>2=Representative              | _ <br>whoresp     |



**Tanzania National Voucher Scheme for insecticide treated nets  
HOUSEHOLD SURVEY**

**Ifakara Health Research and Development Centre *in collaboration with*  
Ministry of Health, Tanzania and London School of Hygiene and Tropical  
Medicine**

*About the household*

|                                                    |                                                                                                                                      |                                                |
|----------------------------------------------------|--------------------------------------------------------------------------------------------------------------------------------------|------------------------------------------------|
| H15                                                | Do you rent this house?<br>1 = yes<br>2=no<br>3=Other (specify)                                                                      | <input type="checkbox"/><br>rent<br>otrent     |
| H16                                                | What kind of toilet facilities does your household have?<br>1 = Flush toilet<br>2 = Pit toilet/latrine<br>3 = No facility/bush/field | <input type="checkbox"/><br>toilet<br>ottoilet |
| <i>In this household is there anyone who owns:</i> |                                                                                                                                      |                                                |
| H17                                                | Radio<br>1= yes<br>2= no                                                                                                             | <input type="checkbox"/><br>radio              |
| H18                                                | Bicycle<br>1= yes<br>2= no                                                                                                           | <input type="checkbox"/><br>bike               |
| H19                                                | Mobile phone<br>1=yes<br>2=no                                                                                                        | <input type="checkbox"/>                       |

|     |                                                                                                                          |                                            |
|-----|--------------------------------------------------------------------------------------------------------------------------|--------------------------------------------|
| H20 | In this house are there ducks or chickens? How many? (write the number; 999 if respondent does not know)                 | <input type="text"/>                       |
| H21 | Do you have animals in this household like goat, sheep or cattle-how many? (write the number; 999= she / he do not know. | <input type="text"/>                       |
| H22 | Is the house connected to electricity<br>1= yes<br>2= no                                                                 | <input type="checkbox"/><br>electric       |
| H23 | What is the main material of the roof:<br>1= Iron sheets or tiles<br>2= Thatch/grass or leaves<br>3= Other (explain)     | <input type="checkbox"/><br>roof<br>otroof |

|     |                                                                                                                                                                                                                                                                    |                                                        |
|-----|--------------------------------------------------------------------------------------------------------------------------------------------------------------------------------------------------------------------------------------------------------------------|--------------------------------------------------------|
| H25 | Have you heard of Hati Punguzo, the discount voucher programme to buy a mosquito net at a cheaper price?<br>1=Yes<br>2=No ( <b>SKIP TO H28</b> )                                                                                                                   | <input type="checkbox"/><br>heardvouch                 |
| H26 | If yes, where did you first hear about the discount voucher?<br>1 = RCH or health facility<br>2 = Shop<br>3 = Family member<br>4 = Neighbour<br>5 = Radio<br>6= Performance by theatre group or roadshow<br>7 = Others<br>8 = Village government<br>8a = Newspaper | <input type="checkbox"/><br>heardwhere<br>otheardwhere |

**Tanzania National Voucher Scheme for insecticide treated nets  
HOUSEHOLD SURVEY**

**Ifakara Health Research and Development Centre *in collaboration with*  
Ministry of Health, Tanzania and London School of Hygiene and Tropical  
Medicine**

|      |                                                                                                                                                                                                                                       |                                                                                                      |
|------|---------------------------------------------------------------------------------------------------------------------------------------------------------------------------------------------------------------------------------------|------------------------------------------------------------------------------------------------------|
|      | <i>9= I don't know</i>                                                                                                                                                                                                                |                                                                                                      |
| H27  | Who is eligible to receive a voucher?<br>1= Pregnant women<br>2= Child < 1<br>3= Pregnant woman and child<br>4=Other (specify)                                                                                                        | <input type="checkbox"/><br>eligible<br><input type="checkbox"/><br>oteligible<br><br><hr/><br><hr/> |
| H27a | Can you tell me the value of HP? (write the amount or write 0 if doesn't know)                                                                                                                                                        | _ _ _ _                                                                                              |
| H47  | Do you ever listen to the radio?<br>(1)Yes (2)No<br><b>If NO go to H54</b>                                                                                                                                                            | <input type="checkbox"/><br>hhradever                                                                |
| H48  | How frequently do you listen to the radio?<br>1) Almost every day,<br>2) At least once a week,<br>3) less than once a week?<br><b>If (b) or (c) go to H50</b>                                                                         | <input type="checkbox"/><br>hhradfreq                                                                |
| H49  | How many times a day do you listen to the radio?<br><b>(Write number)</b>                                                                                                                                                             | <input type="checkbox"/><br>hhradday                                                                 |
| H50  | At what times do you listen to the radio?<br>1)morning 2)afternoon 3)evening 4) night                                                                                                                                                 | <input type="checkbox"/><br>hhradtime                                                                |
| H51  | Which radio stations do you listen mostly?<br>1) Radio free Afrika<br>2) Radio Tanzania (Radio ya Taifa<br>3) Radio Uhuru<br>4) Radio Clouds<br>5) Radio Aboud<br>6) Radio Tumaini<br>7)Radio Ukweli<br>8) PRT<br>9) Others (specify) | <input type="checkbox"/><br>hhradwhich                                                               |
| H52  | <i>If H51==9 (others) specify</i>                                                                                                                                                                                                     | <hr/><br>hhradoth                                                                                    |
| H53  | Which radio programs you most like to listen?<br>1) news bulletin<br>2) sports<br>3) films<br>4) Music<br>5) Others)                                                                                                                  | <input type="checkbox"/><br>hhradprog                                                                |
| H54  | Do you ever watch community drama or road shows performances?<br>(1)Yes (2)No<br><b>If (2)No, go to H57</b>                                                                                                                           | <input type="checkbox"/><br>hhdraever                                                                |
| H55  | Last year, how many times did you watch these shows?                                                                                                                                                                                  | <input type="checkbox"/> <input type="checkbox"/><br>hhdranum                                        |

**Tanzania National Voucher Scheme for insecticide treated nets  
HOUSEHOLD SURVEY**

**Ifakara Health Research and Development Centre *in collaboration with*  
Ministry of Health, Tanzania and London School of Hygiene and Tropical  
Medicine**

|                            |                                                                                                                                                                                                                                                                                                                                                                                                                                                                                                                                                                                                                                                                                                                                                                                                                                                                                                                                                                                                                                                                                                                                                                                                                                                                                                                                                                                                                                                                                                                                                                                                    |                  |               |   |   |          |                    |   |   |          |                    |   |   |          |                     |   |   |          |                        |   |   |           |                 |   |   |          |                            |   |   |          |                    |   |   |           |                          |   |   |           |                       |   |   |          |                        |   |   |           |                  |   |   |          |                 |   |   |           |                 |   |   |            |                 |   |   |           |               |   |   |          |
|----------------------------|----------------------------------------------------------------------------------------------------------------------------------------------------------------------------------------------------------------------------------------------------------------------------------------------------------------------------------------------------------------------------------------------------------------------------------------------------------------------------------------------------------------------------------------------------------------------------------------------------------------------------------------------------------------------------------------------------------------------------------------------------------------------------------------------------------------------------------------------------------------------------------------------------------------------------------------------------------------------------------------------------------------------------------------------------------------------------------------------------------------------------------------------------------------------------------------------------------------------------------------------------------------------------------------------------------------------------------------------------------------------------------------------------------------------------------------------------------------------------------------------------------------------------------------------------------------------------------------------------|------------------|---------------|---|---|----------|--------------------|---|---|----------|--------------------|---|---|----------|---------------------|---|---|----------|------------------------|---|---|-----------|-----------------|---|---|----------|----------------------------|---|---|----------|--------------------|---|---|-----------|--------------------------|---|---|-----------|-----------------------|---|---|----------|------------------------|---|---|-----------|------------------|---|---|----------|-----------------|---|---|-----------|-----------------|---|---|------------|-----------------|---|---|-----------|---------------|---|---|----------|
|                            | <b>(Write number)</b>                                                                                                                                                                                                                                                                                                                                                                                                                                                                                                                                                                                                                                                                                                                                                                                                                                                                                                                                                                                                                                                                                                                                                                                                                                                                                                                                                                                                                                                                                                                                                                              |                  |               |   |   |          |                    |   |   |          |                    |   |   |          |                     |   |   |          |                        |   |   |           |                 |   |   |          |                            |   |   |          |                    |   |   |           |                          |   |   |           |                       |   |   |          |                        |   |   |           |                  |   |   |          |                 |   |   |           |                 |   |   |            |                 |   |   |           |               |   |   |          |
| H56                        | Did you get any HATI PUNGUZO message from these performances?<br>1)Yes 2)No                                                                                                                                                                                                                                                                                                                                                                                                                                                                                                                                                                                                                                                                                                                                                                                                                                                                                                                                                                                                                                                                                                                                                                                                                                                                                                                                                                                                                                                                                                                        | _ <br>hhdrahp    |               |   |   |          |                    |   |   |          |                    |   |   |          |                     |   |   |          |                        |   |   |           |                 |   |   |          |                            |   |   |          |                    |   |   |           |                          |   |   |           |                       |   |   |          |                        |   |   |           |                  |   |   |          |                 |   |   |           |                 |   |   |            |                 |   |   |           |               |   |   |          |
| H57                        | Do you usually read newspapers?<br>1)Yes 2)No<br><b>If 2)No, go to H59</b>                                                                                                                                                                                                                                                                                                                                                                                                                                                                                                                                                                                                                                                                                                                                                                                                                                                                                                                                                                                                                                                                                                                                                                                                                                                                                                                                                                                                                                                                                                                         | _ <br>hhnews     |               |   |   |          |                    |   |   |          |                    |   |   |          |                     |   |   |          |                        |   |   |           |                 |   |   |          |                            |   |   |          |                    |   |   |           |                          |   |   |           |                       |   |   |          |                        |   |   |           |                  |   |   |          |                 |   |   |           |                 |   |   |            |                 |   |   |           |               |   |   |          |
| H58                        | How frequently do you read newspapers?<br>1) Almost every day,<br>2) At least once a week,<br>3) Less than once a week?                                                                                                                                                                                                                                                                                                                                                                                                                                                                                                                                                                                                                                                                                                                                                                                                                                                                                                                                                                                                                                                                                                                                                                                                                                                                                                                                                                                                                                                                            | _ <br>hhnewsfreq |               |   |   |          |                    |   |   |          |                    |   |   |          |                     |   |   |          |                        |   |   |           |                 |   |   |          |                            |   |   |          |                    |   |   |           |                          |   |   |           |                       |   |   |          |                        |   |   |           |                  |   |   |          |                 |   |   |           |                 |   |   |            |                 |   |   |           |               |   |   |          |
| H59                        | Do you usually read posters at health facilities?<br>1)Yes 2)No<br><b>If 2) No, go to H61</b>                                                                                                                                                                                                                                                                                                                                                                                                                                                                                                                                                                                                                                                                                                                                                                                                                                                                                                                                                                                                                                                                                                                                                                                                                                                                                                                                                                                                                                                                                                      | _ <br>hhpostusu  |               |   |   |          |                    |   |   |          |                    |   |   |          |                     |   |   |          |                        |   |   |           |                 |   |   |          |                            |   |   |          |                    |   |   |           |                          |   |   |           |                       |   |   |          |                        |   |   |           |                  |   |   |          |                 |   |   |           |                 |   |   |            |                 |   |   |           |               |   |   |          |
| H60                        | How frequently do you read these posters?<br>1) Almost every time when seen<br>2) Only once and not repeated once seen<br>3) Don't remember                                                                                                                                                                                                                                                                                                                                                                                                                                                                                                                                                                                                                                                                                                                                                                                                                                                                                                                                                                                                                                                                                                                                                                                                                                                                                                                                                                                                                                                        | _ <br>hhpostfreq |               |   |   |          |                    |   |   |          |                    |   |   |          |                     |   |   |          |                        |   |   |           |                 |   |   |          |                            |   |   |          |                    |   |   |           |                          |   |   |           |                       |   |   |          |                        |   |   |           |                  |   |   |          |                 |   |   |           |                 |   |   |            |                 |   |   |           |               |   |   |          |
| H61                        | In the past month, have you heard or seen any messages about HATI PUNGUZO?<br>1)Yes 2)No<br><b>If 2)No, go to H28</b>                                                                                                                                                                                                                                                                                                                                                                                                                                                                                                                                                                                                                                                                                                                                                                                                                                                                                                                                                                                                                                                                                                                                                                                                                                                                                                                                                                                                                                                                              | _ <br>hhmthhp    |               |   |   |          |                    |   |   |          |                    |   |   |          |                     |   |   |          |                        |   |   |           |                 |   |   |          |                            |   |   |          |                    |   |   |           |                          |   |   |           |                       |   |   |          |                        |   |   |           |                  |   |   |          |                 |   |   |           |                 |   |   |            |                 |   |   |           |               |   |   |          |
| H61                        | <p>Where did you hear or see these messages?<br/><b>(do not ask but wait for respondent to mention) (1=Yes, 2=No)</b></p> <table style="width: 100%; border-collapse: collapse;"> <tr> <td style="width: 70%;">a) RADIO.....</td> <td style="width: 5%;">1</td> <td style="width: 5%;">2</td> <td style="width: 15%;">hhmthrad</td> </tr> <tr> <td>b) NEWSPAPERS.....</td> <td>1</td> <td>2</td> <td>hmthnews</td> </tr> <tr> <td>c) MAGAZINES .....</td> <td>1</td> <td>2</td> <td>hhmthmag</td> </tr> <tr> <td>d) BILLBOARDS .....</td> <td>1</td> <td>2</td> <td>hhmthbrd</td> </tr> <tr> <td>e) FOOTBALL MATCH.....</td> <td>1</td> <td>2</td> <td>hhmthfoot</td> </tr> <tr> <td>f) CONCERT.....</td> <td>1</td> <td>2</td> <td>hhmthcon</td> </tr> <tr> <td>g) COMMUNITY RALLY / .....</td> <td>1</td> <td>2</td> <td>hhmthral</td> </tr> <tr> <td>h) ROAD SHOW .....</td> <td>1</td> <td>2</td> <td>hhmthroad</td> </tr> <tr> <td>i) TEE SHIRTS/CAPS .....</td> <td>1</td> <td>2</td> <td>hhmthroad</td> </tr> <tr> <td>j) MOBILE VIDEO .....</td> <td>1</td> <td>2</td> <td>hhmthvid</td> </tr> <tr> <td>k) TIRE PROTECTOR.....</td> <td>1</td> <td>2</td> <td>hhmthtire</td> </tr> <tr> <td>l) CALENDAR.....</td> <td>1</td> <td>2</td> <td>hhmthcal</td> </tr> <tr> <td>m) POSTER .....</td> <td>1</td> <td>2</td> <td>hhmthpost</td> </tr> <tr> <td>n) STICKER.....</td> <td>1</td> <td>2</td> <td>hhmthstick</td> </tr> <tr> <td>o) CLINIC .....</td> <td>1</td> <td>2</td> <td>hhmthclin</td> </tr> <tr> <td>p) OTHER.....</td> <td>1</td> <td>2</td> <td>hhmthoth</td> </tr> </table> |                  | a) RADIO..... | 1 | 2 | hhmthrad | b) NEWSPAPERS..... | 1 | 2 | hmthnews | c) MAGAZINES ..... | 1 | 2 | hhmthmag | d) BILLBOARDS ..... | 1 | 2 | hhmthbrd | e) FOOTBALL MATCH..... | 1 | 2 | hhmthfoot | f) CONCERT..... | 1 | 2 | hhmthcon | g) COMMUNITY RALLY / ..... | 1 | 2 | hhmthral | h) ROAD SHOW ..... | 1 | 2 | hhmthroad | i) TEE SHIRTS/CAPS ..... | 1 | 2 | hhmthroad | j) MOBILE VIDEO ..... | 1 | 2 | hhmthvid | k) TIRE PROTECTOR..... | 1 | 2 | hhmthtire | l) CALENDAR..... | 1 | 2 | hhmthcal | m) POSTER ..... | 1 | 2 | hhmthpost | n) STICKER..... | 1 | 2 | hhmthstick | o) CLINIC ..... | 1 | 2 | hhmthclin | p) OTHER..... | 1 | 2 | hhmthoth |
| a) RADIO.....              | 1                                                                                                                                                                                                                                                                                                                                                                                                                                                                                                                                                                                                                                                                                                                                                                                                                                                                                                                                                                                                                                                                                                                                                                                                                                                                                                                                                                                                                                                                                                                                                                                                  | 2                | hhmthrad      |   |   |          |                    |   |   |          |                    |   |   |          |                     |   |   |          |                        |   |   |           |                 |   |   |          |                            |   |   |          |                    |   |   |           |                          |   |   |           |                       |   |   |          |                        |   |   |           |                  |   |   |          |                 |   |   |           |                 |   |   |            |                 |   |   |           |               |   |   |          |
| b) NEWSPAPERS.....         | 1                                                                                                                                                                                                                                                                                                                                                                                                                                                                                                                                                                                                                                                                                                                                                                                                                                                                                                                                                                                                                                                                                                                                                                                                                                                                                                                                                                                                                                                                                                                                                                                                  | 2                | hmthnews      |   |   |          |                    |   |   |          |                    |   |   |          |                     |   |   |          |                        |   |   |           |                 |   |   |          |                            |   |   |          |                    |   |   |           |                          |   |   |           |                       |   |   |          |                        |   |   |           |                  |   |   |          |                 |   |   |           |                 |   |   |            |                 |   |   |           |               |   |   |          |
| c) MAGAZINES .....         | 1                                                                                                                                                                                                                                                                                                                                                                                                                                                                                                                                                                                                                                                                                                                                                                                                                                                                                                                                                                                                                                                                                                                                                                                                                                                                                                                                                                                                                                                                                                                                                                                                  | 2                | hhmthmag      |   |   |          |                    |   |   |          |                    |   |   |          |                     |   |   |          |                        |   |   |           |                 |   |   |          |                            |   |   |          |                    |   |   |           |                          |   |   |           |                       |   |   |          |                        |   |   |           |                  |   |   |          |                 |   |   |           |                 |   |   |            |                 |   |   |           |               |   |   |          |
| d) BILLBOARDS .....        | 1                                                                                                                                                                                                                                                                                                                                                                                                                                                                                                                                                                                                                                                                                                                                                                                                                                                                                                                                                                                                                                                                                                                                                                                                                                                                                                                                                                                                                                                                                                                                                                                                  | 2                | hhmthbrd      |   |   |          |                    |   |   |          |                    |   |   |          |                     |   |   |          |                        |   |   |           |                 |   |   |          |                            |   |   |          |                    |   |   |           |                          |   |   |           |                       |   |   |          |                        |   |   |           |                  |   |   |          |                 |   |   |           |                 |   |   |            |                 |   |   |           |               |   |   |          |
| e) FOOTBALL MATCH.....     | 1                                                                                                                                                                                                                                                                                                                                                                                                                                                                                                                                                                                                                                                                                                                                                                                                                                                                                                                                                                                                                                                                                                                                                                                                                                                                                                                                                                                                                                                                                                                                                                                                  | 2                | hhmthfoot     |   |   |          |                    |   |   |          |                    |   |   |          |                     |   |   |          |                        |   |   |           |                 |   |   |          |                            |   |   |          |                    |   |   |           |                          |   |   |           |                       |   |   |          |                        |   |   |           |                  |   |   |          |                 |   |   |           |                 |   |   |            |                 |   |   |           |               |   |   |          |
| f) CONCERT.....            | 1                                                                                                                                                                                                                                                                                                                                                                                                                                                                                                                                                                                                                                                                                                                                                                                                                                                                                                                                                                                                                                                                                                                                                                                                                                                                                                                                                                                                                                                                                                                                                                                                  | 2                | hhmthcon      |   |   |          |                    |   |   |          |                    |   |   |          |                     |   |   |          |                        |   |   |           |                 |   |   |          |                            |   |   |          |                    |   |   |           |                          |   |   |           |                       |   |   |          |                        |   |   |           |                  |   |   |          |                 |   |   |           |                 |   |   |            |                 |   |   |           |               |   |   |          |
| g) COMMUNITY RALLY / ..... | 1                                                                                                                                                                                                                                                                                                                                                                                                                                                                                                                                                                                                                                                                                                                                                                                                                                                                                                                                                                                                                                                                                                                                                                                                                                                                                                                                                                                                                                                                                                                                                                                                  | 2                | hhmthral      |   |   |          |                    |   |   |          |                    |   |   |          |                     |   |   |          |                        |   |   |           |                 |   |   |          |                            |   |   |          |                    |   |   |           |                          |   |   |           |                       |   |   |          |                        |   |   |           |                  |   |   |          |                 |   |   |           |                 |   |   |            |                 |   |   |           |               |   |   |          |
| h) ROAD SHOW .....         | 1                                                                                                                                                                                                                                                                                                                                                                                                                                                                                                                                                                                                                                                                                                                                                                                                                                                                                                                                                                                                                                                                                                                                                                                                                                                                                                                                                                                                                                                                                                                                                                                                  | 2                | hhmthroad     |   |   |          |                    |   |   |          |                    |   |   |          |                     |   |   |          |                        |   |   |           |                 |   |   |          |                            |   |   |          |                    |   |   |           |                          |   |   |           |                       |   |   |          |                        |   |   |           |                  |   |   |          |                 |   |   |           |                 |   |   |            |                 |   |   |           |               |   |   |          |
| i) TEE SHIRTS/CAPS .....   | 1                                                                                                                                                                                                                                                                                                                                                                                                                                                                                                                                                                                                                                                                                                                                                                                                                                                                                                                                                                                                                                                                                                                                                                                                                                                                                                                                                                                                                                                                                                                                                                                                  | 2                | hhmthroad     |   |   |          |                    |   |   |          |                    |   |   |          |                     |   |   |          |                        |   |   |           |                 |   |   |          |                            |   |   |          |                    |   |   |           |                          |   |   |           |                       |   |   |          |                        |   |   |           |                  |   |   |          |                 |   |   |           |                 |   |   |            |                 |   |   |           |               |   |   |          |
| j) MOBILE VIDEO .....      | 1                                                                                                                                                                                                                                                                                                                                                                                                                                                                                                                                                                                                                                                                                                                                                                                                                                                                                                                                                                                                                                                                                                                                                                                                                                                                                                                                                                                                                                                                                                                                                                                                  | 2                | hhmthvid      |   |   |          |                    |   |   |          |                    |   |   |          |                     |   |   |          |                        |   |   |           |                 |   |   |          |                            |   |   |          |                    |   |   |           |                          |   |   |           |                       |   |   |          |                        |   |   |           |                  |   |   |          |                 |   |   |           |                 |   |   |            |                 |   |   |           |               |   |   |          |
| k) TIRE PROTECTOR.....     | 1                                                                                                                                                                                                                                                                                                                                                                                                                                                                                                                                                                                                                                                                                                                                                                                                                                                                                                                                                                                                                                                                                                                                                                                                                                                                                                                                                                                                                                                                                                                                                                                                  | 2                | hhmthtire     |   |   |          |                    |   |   |          |                    |   |   |          |                     |   |   |          |                        |   |   |           |                 |   |   |          |                            |   |   |          |                    |   |   |           |                          |   |   |           |                       |   |   |          |                        |   |   |           |                  |   |   |          |                 |   |   |           |                 |   |   |            |                 |   |   |           |               |   |   |          |
| l) CALENDAR.....           | 1                                                                                                                                                                                                                                                                                                                                                                                                                                                                                                                                                                                                                                                                                                                                                                                                                                                                                                                                                                                                                                                                                                                                                                                                                                                                                                                                                                                                                                                                                                                                                                                                  | 2                | hhmthcal      |   |   |          |                    |   |   |          |                    |   |   |          |                     |   |   |          |                        |   |   |           |                 |   |   |          |                            |   |   |          |                    |   |   |           |                          |   |   |           |                       |   |   |          |                        |   |   |           |                  |   |   |          |                 |   |   |           |                 |   |   |            |                 |   |   |           |               |   |   |          |
| m) POSTER .....            | 1                                                                                                                                                                                                                                                                                                                                                                                                                                                                                                                                                                                                                                                                                                                                                                                                                                                                                                                                                                                                                                                                                                                                                                                                                                                                                                                                                                                                                                                                                                                                                                                                  | 2                | hhmthpost     |   |   |          |                    |   |   |          |                    |   |   |          |                     |   |   |          |                        |   |   |           |                 |   |   |          |                            |   |   |          |                    |   |   |           |                          |   |   |           |                       |   |   |          |                        |   |   |           |                  |   |   |          |                 |   |   |           |                 |   |   |            |                 |   |   |           |               |   |   |          |
| n) STICKER.....            | 1                                                                                                                                                                                                                                                                                                                                                                                                                                                                                                                                                                                                                                                                                                                                                                                                                                                                                                                                                                                                                                                                                                                                                                                                                                                                                                                                                                                                                                                                                                                                                                                                  | 2                | hhmthstick    |   |   |          |                    |   |   |          |                    |   |   |          |                     |   |   |          |                        |   |   |           |                 |   |   |          |                            |   |   |          |                    |   |   |           |                          |   |   |           |                       |   |   |          |                        |   |   |           |                  |   |   |          |                 |   |   |           |                 |   |   |            |                 |   |   |           |               |   |   |          |
| o) CLINIC .....            | 1                                                                                                                                                                                                                                                                                                                                                                                                                                                                                                                                                                                                                                                                                                                                                                                                                                                                                                                                                                                                                                                                                                                                                                                                                                                                                                                                                                                                                                                                                                                                                                                                  | 2                | hhmthclin     |   |   |          |                    |   |   |          |                    |   |   |          |                     |   |   |          |                        |   |   |           |                 |   |   |          |                            |   |   |          |                    |   |   |           |                          |   |   |           |                       |   |   |          |                        |   |   |           |                  |   |   |          |                 |   |   |           |                 |   |   |            |                 |   |   |           |               |   |   |          |
| p) OTHER.....              | 1                                                                                                                                                                                                                                                                                                                                                                                                                                                                                                                                                                                                                                                                                                                                                                                                                                                                                                                                                                                                                                                                                                                                                                                                                                                                                                                                                                                                                                                                                                                                                                                                  | 2                | hhmthoth      |   |   |          |                    |   |   |          |                    |   |   |          |                     |   |   |          |                        |   |   |           |                 |   |   |          |                            |   |   |          |                    |   |   |           |                          |   |   |           |                       |   |   |          |                        |   |   |           |                  |   |   |          |                 |   |   |           |                 |   |   |            |                 |   |   |           |               |   |   |          |
| H28                        | How many mosquito nets does your household have?<br><b>If "0" SKIP TO M1</b>                                                                                                                                                                                                                                                                                                                                                                                                                                                                                                                                                                                                                                                                                                                                                                                                                                                                                                                                                                                                                                                                                                                                                                                                                                                                                                                                                                                                                                                                                                                       | _ _ <br>numnets  |               |   |   |          |                    |   |   |          |                    |   |   |          |                     |   |   |          |                        |   |   |           |                 |   |   |          |                            |   |   |          |                    |   |   |           |                          |   |   |           |                       |   |   |          |                        |   |   |           |                  |   |   |          |                 |   |   |           |                 |   |   |            |                 |   |   |           |               |   |   |          |

|     |                                                 |                     |                     |                     |
|-----|-------------------------------------------------|---------------------|---------------------|---------------------|
|     |                                                 | Net # 1             | Net # 2             | Net # 3             |
| H29 | <b>Is the net observed?</b><br>1 =Yes<br>2 = No | _ <br>seennet1      | _ <br>seennet2      | _ <br>seennet3      |
| H30 | How long ago did your household obtain the      | _ _ <br>whenbought1 | _ _ <br>whenbought2 | _ _ <br>whenbought3 |

**Tanzania National Voucher Scheme for insecticide treated nets  
HOUSEHOLD SURVEY**

**Ifakara Health Research and Development Centre *in collaboration with*  
Ministry of Health, Tanzania and London School of Hygiene and Tropical  
Medicine**

|      |                                                                                                                                                                                                                                  |                                                                                                                                                                                                                                                                                                                                                     |                                                            |                                                            |  |  |                                                                                                                                                                                                                                                    |  |  |                                                                                                                                            |
|------|----------------------------------------------------------------------------------------------------------------------------------------------------------------------------------------------------------------------------------|-----------------------------------------------------------------------------------------------------------------------------------------------------------------------------------------------------------------------------------------------------------------------------------------------------------------------------------------------------|------------------------------------------------------------|------------------------------------------------------------|--|--|----------------------------------------------------------------------------------------------------------------------------------------------------------------------------------------------------------------------------------------------------|--|--|--------------------------------------------------------------------------------------------------------------------------------------------|
|      | mosquito net?<br>(Months ago)<br><b>If more than 3 years,<br/>indicate 96</b><br><b>Don't know write 99</b>                                                                                                                      |                                                                                                                                                                                                                                                                                                                                                     |                                                            |                                                            |  |  |                                                                                                                                                                                                                                                    |  |  |                                                                                                                                            |
| H31  | Was the net purchased using a voucher/Hati Punguzo?<br>1=Yes<br>2=No<br>9=Don't know                                                                                                                                             | <input type="checkbox"/><br>usedvouch1                                                                                                                                                                                                                                                                                                              | <input type="checkbox"/><br>usedvouch2                     | <input type="checkbox"/><br>usedvouch3                     |  |  |                                                                                                                                                                                                                                                    |  |  |                                                                                                                                            |
| H31a | Did you receive the net (free during the free nets distribution to children)<br><b>FOR TANDAHIMBA AND NACHINGWEA ONLY</b><br>1=Yes 2=No                                                                                          |                                                                                                                                                                                                                                                                                                                                                     |                                                            |                                                            |  |  |                                                                                                                                                                                                                                                    |  |  |                                                                                                                                            |
| H32  | From what kind of source did your household obtain the mosquito net?<br>1=Shop<br>2= Hawker (mobile)<br>3= Health facility<br>4= Government or NGO project<br>5= Other<br>6= Shifting market (gulio)<br>7= Gift<br>9= Don't know | <input type="checkbox"/><br>wherebought1<br>otwherebought1                                                                                                                                                                                                                                                                                          | <input type="checkbox"/><br>wherebought2<br>otwherebought2 | <input type="checkbox"/><br>wherebought3<br>otwherebought3 |  |  |                                                                                                                                                                                                                                                    |  |  |                                                                                                                                            |
| H33  | What size is the net?<br>1=3.5X6<br>2=4X6<br>3=6X6<br>4=Other                                                                                                                                                                    | <input type="checkbox"/><br>size1<br>otsize1                                                                                                                                                                                                                                                                                                        | <input type="checkbox"/><br>size2<br>otsize2               | <input type="checkbox"/><br>size3<br>otsize3               |  |  |                                                                                                                                                                                                                                                    |  |  |                                                                                                                                            |
| H34  | What price was paid for this net?<br><b>(write "0" if gift)</b><br><b>(write "9999" if don't know)</b>                                                                                                                           | TSh. _____<br>Paidnet1                                                                                                                                                                                                                                                                                                                              | TSh. _____<br>Paidnet2                                     | TSh. _____<br>Paidnet3                                     |  |  |                                                                                                                                                                                                                                                    |  |  |                                                                                                                                            |
| H36  | Did the net come packaged with a sachet of insecticide?<br>1=Yes<br>2=No<br>9=Don't know                                                                                                                                         | <input type="checkbox"/><br>withngao1                                                                                                                                                                                                                                                                                                               | <input type="checkbox"/><br>Withngao2                      | <input type="checkbox"/><br>withngao3                      |  |  |                                                                                                                                                                                                                                                    |  |  |                                                                                                                                            |
| H37  | Has this net ever been treated?<br>1=Yes<br>2=No <b>(SKIP TO H39)</b><br>3=Not sure <b>(SKIP TO H39)</b>                                                                                                                         | <input type="checkbox"/><br>evertreat1                                                                                                                                                                                                                                                                                                              | <input type="checkbox"/><br>evertreat2                     | <input type="checkbox"/><br>evertreat3                     |  |  |                                                                                                                                                                                                                                                    |  |  |                                                                                                                                            |
| H38  | When was the last time the net was treated?<br>(month/year)<br><b>(If don't know, write 1 July 2009)</b>                                                                                                                         | <table border="1" style="display: inline-table; vertical-align: middle;"><tr><td style="width: 20px; height: 20px;"></td><td style="width: 20px; height: 20px;"></td></tr><tr><td style="width: 20px; height: 20px;"></td><td style="width: 20px; height: 20px;"></td></tr></table><br><input style="width: 50px; margin-left: 10px;" type="text"/> |                                                            |                                                            |  |  | <table border="1" style="display: inline-table; vertical-align: middle;"><tr><td style="width: 20px; height: 20px;"></td><td style="width: 20px; height: 20px;"></td></tr></table><br><input style="width: 50px; margin-left: 10px;" type="text"/> |  |  | <input style="width: 50px; margin-left: 10px;" type="text"/><br><input style="width: 50px; margin-left: 10px;" type="text"/><br>lasttreat3 |
|      |                                                                                                                                                                                                                                  |                                                                                                                                                                                                                                                                                                                                                     |                                                            |                                                            |  |  |                                                                                                                                                                                                                                                    |  |  |                                                                                                                                            |
|      |                                                                                                                                                                                                                                  |                                                                                                                                                                                                                                                                                                                                                     |                                                            |                                                            |  |  |                                                                                                                                                                                                                                                    |  |  |                                                                                                                                            |
|      |                                                                                                                                                                                                                                  |                                                                                                                                                                                                                                                                                                                                                     |                                                            |                                                            |  |  |                                                                                                                                                                                                                                                    |  |  |                                                                                                                                            |



**Tanzania National Voucher Scheme for insecticide treated nets  
HOUSEHOLD SURVEY**

**Ifakara Health Research and Development Centre *in collaboration with*  
Ministry of Health, Tanzania and London School of Hygiene and Tropical  
Medicine**

**Module 2: Women aged 15-49 years**

|    |                                                         |                                  |
|----|---------------------------------------------------------|----------------------------------|
| M1 | Name of the mother                                      | mothername                       |
| M2 | ID of the mother<br>(District/cluster/household/person) | _ / _ _ / _ _ / _ _ <br>motherid |

|    |                                                                                   |                            |
|----|-----------------------------------------------------------------------------------|----------------------------|
| M3 | Is it possible to interview the woman?<br>1 = yes ( <b>SKIP TO M5</b> )<br>2 = No | _ <br>intwom1              |
| M4 | Why is it not possible to interview?<br>1=Travelled away<br>2 = Sick<br>3 = Other | _ <br>whynot1<br>otwhynot1 |

|    |                                                                          |                   |
|----|--------------------------------------------------------------------------|-------------------|
| M5 | Have you read her the consent form?<br>1= yes<br>2=no                    | _ <br>readconsent |
| M6 | Does the mother agree?<br>1=yes<br>2=no <b>IF NO, END INTERVIEW HERE</b> | _ <br>motheragree |

**Interviewer: If the eligible woman was the respondent to Module 1, skip to M10**

|     |                                                                                                                                                                                                                                                                                                      |                                  |
|-----|------------------------------------------------------------------------------------------------------------------------------------------------------------------------------------------------------------------------------------------------------------------------------------------------------|----------------------------------|
| M7  | Have you heard about the discount voucher programme for buying a net at a cheaper price?<br>1=Yes<br>2=No ( <b>SKIP TO M10</b> )                                                                                                                                                                     | _ <br>heardvouch                 |
| M8  | If yes, where did you first hear about the discount voucher?<br>1 = RCH or health facility<br>2 = Shop<br>3 = Family member<br>4 = Neighbour<br>5 = Radio<br>6= Performance by theatre group or roadshow<br>7 = Others<br>8 = Village government<br>8a = Newspaper<br>9= I don't know                | _ <br>heardwhere<br>otheardwhere |
| M8a | Where else have you heard about the discount voucher? (tick all that apply)<br>1 = RCH or health facility<br>2 = Shop<br>3 = Family member<br>4 = Neighbour<br>5 = Radio<br>6= Performance by theatre group or roadshow<br>7 = Others<br>8 = Village government<br>8a = Newspaper<br>9= I don't know |                                  |



**Tanzania National Voucher Scheme for insecticide treated nets  
HOUSEHOLD SURVEY**

**Ifakara Health Research and Development Centre *in collaboration with*  
Ministry of Health, Tanzania and London School of Hygiene and Tropical  
Medicine**

|     |                                                                                                                                                                                                                                       |                              |
|-----|---------------------------------------------------------------------------------------------------------------------------------------------------------------------------------------------------------------------------------------|------------------------------|
|     |                                                                                                                                                                                                                                       |                              |
| M9  | Who is eligible to receive a voucher?<br>1=Pregnant women<br>2= Child < 1<br>3=Pregnant woman and child<br>4=Other (specify)                                                                                                          | _ <br>eligible<br>oteligible |
| M9a | Can you tell me the value of HP? (write the amount<br>or write 0 if doesn't know)                                                                                                                                                     | _ _ _ _ _                    |
| M75 | Do you ever listen to the radio?<br>(1)Yes (2)No<br><b>If NO go to M82</b>                                                                                                                                                            | _ <br>femradever             |
| M76 | How frequently do you listen to the radio?<br>1) Almost every day,<br>2) At least once a week,<br>3) less than once a week?<br><b>If (2) or (3) go to M78</b>                                                                         | _ <br>femradfreq             |
| M77 | How many times a day do you listen to the radio?<br><b>(Write number)</b>                                                                                                                                                             | _ <br>femradday              |
| M78 | At what times do you listen to the radio?<br>1)morning 2)afternoon 3)evening 4) night                                                                                                                                                 | _ <br>femradtime             |
| M79 | Which radio stations do you listen mostly?<br>1) Radio free Afrika<br>2) Radio Tanzania (Radio ya Taifa<br>3) Radio Uhuru<br>4) Radio Clouds<br>5) Radio Aboud<br>6) Radio Tumaini<br>7)Radio Ukweli<br>8) PRT<br>9) Others (explain) | _ <br>femradwhich            |
| M80 | <b>If M79==9 (others) specify</b>                                                                                                                                                                                                     | _____<br>femradoth           |
| M81 | Which radio programs you most like to listen?<br>1) news bulletin 2) sports 3) films 4) Music<br>5) Others                                                                                                                            | _ <br>femradprog             |
| M82 | Do you ever watch community drama or road shows<br>performances?<br>(1)Yes (2)No<br><b>If (2)No, go to M85</b>                                                                                                                        | _ <br>femdraever             |
| M83 | Last year, how many times did you watch these<br>shows?<br><b>(Write number)</b>                                                                                                                                                      | _ _ <br>femdranum            |
| M84 | Did you get any HATI PUNGUZO message from<br>these performances?<br>1)Yes 2)No                                                                                                                                                        | _ <br>femdrahp               |
| M85 | Do you usually read newspapers?<br>1)Yes 2)No<br><b>If 2)No, go to M87</b>                                                                                                                                                            | _ <br>femnews                |
| M86 | How frequently do you read newspapers?<br>1) Almost every day,<br>2) At least once a week,                                                                                                                                            | _ <br>femnewsfreq            |

**Tanzania National Voucher Scheme for insecticide treated nets  
HOUSEHOLD SURVEY**

**Ifakara Health Research and Development Centre *in collaboration with*  
Ministry of Health, Tanzania and London School of Hygiene and Tropical  
Medicine**

|     |                                                                                                                                                                  |                                         |
|-----|------------------------------------------------------------------------------------------------------------------------------------------------------------------|-----------------------------------------|
|     | 3) <i>Less than once a week?</i>                                                                                                                                 |                                         |
| M87 | Do you usually read posters at health facilities?<br>1)Yes 2)No<br><b>If 2) No, go to M89</b>                                                                    | <input type="checkbox"/><br>fempostusu  |
| M88 | How frequently do you read these posters?<br>1) <i>Almost every time when seen</i><br>2) <i>Only once and not repeated once seen</i><br>3) <i>Don't remember</i> | <input type="checkbox"/><br>fempostfreq |
| M89 | In the past month, have you heard or seen any messages about HATI PUNGUZO?<br>1)Yes 2)No<br><b>If 2)No, go to M10</b>                                            | <input type="checkbox"/><br>femthhp     |
| M90 | Where did you hear or see these messages? ( <b>do not ask but wait for respondent to mention</b> ) (1=Yes, 2=No)                                                 |                                         |
|     | a) RADIO .....                                                                                                                                                   | 1 2 femthrad                            |
|     | b) NEWSPAPERS .....                                                                                                                                              | 1 2 femthnews                           |
|     | c) MAGAZINES .....                                                                                                                                               | 1 2 femthmag                            |
|     | d) BILLBOARDS .....                                                                                                                                              | 1 2 femthbrd                            |
|     | e) FOOTBALL MATCH.....                                                                                                                                           | 1 2 femthfoot                           |
|     | f) CONCERT .....                                                                                                                                                 | 1 2 femthcon                            |
|     | g) COMMUNITY RALLY / .....                                                                                                                                       | 1 2 femthral                            |
|     | h) ROAD SHOW .....                                                                                                                                               | 1 2 femthroad                           |
|     | i) TEE SHIRTS/CAPS .....                                                                                                                                         | 1 2 femthroad                           |
|     | j) MOBILE VIDEO.....                                                                                                                                             | 1 2 femthvid                            |
|     | k) TIRE PROTECTOR .....                                                                                                                                          | 1 2 femthtire                           |
|     | l) CALENDAR.....                                                                                                                                                 | 1 2 femthcal                            |
|     | m)POSTER .....                                                                                                                                                   | 1 2 femthpost                           |
|     | n) STICKER .....                                                                                                                                                 | 1 2 femthstick                          |
|     | o) CLINIC .....                                                                                                                                                  | 1 2 femthclin                           |
|     | p) NYINGINE.....                                                                                                                                                 | 1 2 femthoth                            |

Now I would like to ask you some questions about your health right now.

|      |                                                                                                            |                                       |
|------|------------------------------------------------------------------------------------------------------------|---------------------------------------|
| M10  | Have you ever been pregnant? (even if this did not lead to a live birth)<br>1 = Yes<br>2 = No              | <input type="checkbox"/><br>everpg    |
| M11  | Are you currently pregnant?<br>1=Yes<br>2=No ( <b>SKIP TO M42</b> )                                        | <input type="checkbox"/><br>currentpg |
| M11a | Which number pregnancy is this?<br>(write number)                                                          | Gravid                                |
| M12  | What gestation are you now?<br>(record no. weeks)                                                          | <input type="checkbox"/><br>gestation |
| M13  | Have you already attended the RCH this pregnancy?<br>1 = Yes 2 = No ( <b>SKIP TO M39</b> )                 | <input type="checkbox"/><br>attendRCH |
| M13a | Did you go to a clinic building for RCH services or did you go to outreach services?<br>1= clinic building | <input type="checkbox"/><br>outreach  |

**Tanzania National Voucher Scheme for insecticide treated nets  
HOUSEHOLD SURVEY**

**Ifakara Health Research and Development Centre *in collaboration with*  
Ministry of Health, Tanzania and London School of Hygiene and Tropical  
Medicine**

|      |                                                                                                                                                                                                                                                                                                   |                                                                                                                                         |
|------|---------------------------------------------------------------------------------------------------------------------------------------------------------------------------------------------------------------------------------------------------------------------------------------------------|-----------------------------------------------------------------------------------------------------------------------------------------|
|      | 2= outreach                                                                                                                                                                                                                                                                                       |                                                                                                                                         |
| M14  | May I see your RCH card?<br>When did your first visit take place?<br>(month/year)<br><b>Interviewer: record from card if available</b>                                                                                                                                                            | _ _ / _ _ _ _ <br>firstvisit                                                                                                            |
| M15  | 1=Date recorded from card<br>2=Date reported by woman                                                                                                                                                                                                                                             | _ <br>visitverif                                                                                                                        |
| M16  | How old was your pregnancy at the first visit? (record no.weeks)<br><b>Interviewer: record from card if available</b>                                                                                                                                                                             | _ _ <br>gestfirstvis                                                                                                                    |
| M17  | 1=Gestation recorded from card<br>2=Gestation reported by woman                                                                                                                                                                                                                                   | _ <br>gestverif                                                                                                                         |
| M17a | Did you receive health messages from health workers during your RCH visits so far this pregnancy?<br>1)Yes 2)No                                                                                                                                                                                   | _ <br>clinicmsg                                                                                                                         |
| M17b | Messages were on what?<br><b>(mark all mentioned)</b><br><b>(wait for respondent – do not prompt)</b><br>(a) Malaria<br>(b)Hati Punguzo<br>(c) HIV/AIDS<br>(d) Family planning<br>(e) Delivery of baby<br>(f) Looking after baby<br>(g)Nutrition while pregnant<br>(h) Dont remember<br>(i) Other | clinmall_ _ <br>clinhp _ _ <br>clinhiv_ _ <br>clinfp _ _ <br>clindeliv_ _ <br>clincar _ _ <br>clinnut_ _ <br>clindk _ _ <br>clinoth _ _ |
| M18  | When you went to the clinic were you given the medicine to prevent malaria?<br>1= Yes<br>2= No (Go to M21).                                                                                                                                                                                       |                                                                                                                                         |
| M19  | Which medicine were you have given to prevent malaria? (do not prompt)<br>1 = SP /fansidar<br>2= Other medicine<br>9= do not know                                                                                                                                                                 |                                                                                                                                         |
| M21  | At the clinic, were you asked if you would like to get SP medicine to prevent Malaria?<br>1=Yes<br>2=No                                                                                                                                                                                           |                                                                                                                                         |
| M22  | Why did you not use this medicine<br>1= I don't like<br>2= It can abort the pregnancy<br>3= it_causes_other_problems<br>4= My husband will not agree<br>5= Other                                                                                                                                  |                                                                                                                                         |
| M23  | Did an RCH worker give you a discount voucher for buying a mosquito net?<br><b>(Interviewer: show copy of Hati Punguzo)</b>                                                                                                                                                                       | _ <br>recdvouch                                                                                                                         |

**Tanzania National Voucher Scheme for insecticide treated nets  
HOUSEHOLD SURVEY**

**Ifakara Health Research and Development Centre *in collaboration with*  
Ministry of Health, Tanzania and London School of Hygiene and Tropical  
Medicine**

|     |                                                                                                                                                                                                                                                                                                                                                                                                                                |                                              |
|-----|--------------------------------------------------------------------------------------------------------------------------------------------------------------------------------------------------------------------------------------------------------------------------------------------------------------------------------------------------------------------------------------------------------------------------------|----------------------------------------------|
|     | 1=Yes<br>2=No ( <b>SKIP TO M39</b> )                                                                                                                                                                                                                                                                                                                                                                                           |                                              |
| M24 | Did you have to pay money to somebody at the RCH clinic to get the voucher?<br>1=Yes<br>2=No ( <b>SKIP TO M26</b> )                                                                                                                                                                                                                                                                                                            | _ <br>paidvouch                              |
| M25 | How much did you have to pay? (TSh)                                                                                                                                                                                                                                                                                                                                                                                            | _ _ _ _ <br>paidhowmuch                      |
| M26 | Was the voucher used to buy a net?<br>1=Yes ( <b>SKIP TO M29</b> )<br>2=No                                                                                                                                                                                                                                                                                                                                                     | _ <br>usevouch                               |
| M27 | Why wasn't the voucher used to buy a net?<br>1 = I gave the voucher to somebody else<br>2 = I already had a net<br>3 = I had no money to buy a net<br>4 = I lost the voucher<br>5 = I bought another commodity<br>6 = I sold the voucher to somebody else<br>7 = The place to buy a net is too far<br>8 = I don't know where to buy a net<br>9=No shop nearby selling nets<br>10 = Nets too expensive<br>11 = Other (specify). | _ <br> _ <br> _ <br>Whynotuse<br>Otwhynotuse |
| M28 | Do you still have the voucher?<br>1=Yes ( <b>SKIP TO M39</b> )<br>2=No ( <b>SKIP TO M39</b> )                                                                                                                                                                                                                                                                                                                                  | _ <br>stillhave                              |
| M29 | Who went to buy the net?<br>1=Self<br>2=Husband<br>3=Relative<br>4=Friend<br>5=Other                                                                                                                                                                                                                                                                                                                                           |                                              |
| M30 | When was the net bought?<br><i>If not known, write 1 July 2009</i>                                                                                                                                                                                                                                                                                                                                                             | _ _ / _ _ / _ _ _ _ <br>whenbuy              |
| M31 | Where was the net bought?<br>1=Shop<br>2=Machinga<br>3=Health facility<br>4=Government or NGO project<br>5=Market<br>6=Other (specify)<br>9=Don't know                                                                                                                                                                                                                                                                         | _ <br>wherebuy<br>otwherebuy                 |
| M32 | How long did it take you (or the person who bought the net) to get to the place where you bought the net? (minutes) <b>WRITE 999 IF DON'T KNOW</b>                                                                                                                                                                                                                                                                             | _ _ _ <br>timebuy                            |
| M33 | How much was paid as transport costs? (TSh)<br><b>(Interviewer: If paid nothing write 0; write 9999 if don't know)</b>                                                                                                                                                                                                                                                                                                         | _ _ _ _ <br>transbuy                         |
| M34 | What size is the net?<br>1=3.5X6 2=4X6 3=6X6 4 = Other                                                                                                                                                                                                                                                                                                                                                                         | Sizenet<br>Otsizenet                         |
| M35 | How much was paid to buy the net (after using discount voucher)?                                                                                                                                                                                                                                                                                                                                                               | _ _ _ _ <br>costnet                          |
| M36 | Did you have any other difficulties in using the voucher scheme to buy a net?                                                                                                                                                                                                                                                                                                                                                  | _ <br>probbuy                                |

**Tanzania National Voucher Scheme for insecticide treated nets  
HOUSEHOLD SURVEY**

**Ifakara Health Research and Development Centre *in collaboration with*  
Ministry of Health, Tanzania and London School of Hygiene and Tropical  
Medicine**

|     |                                                                                                                                                                      |                                                    |
|-----|----------------------------------------------------------------------------------------------------------------------------------------------------------------------|----------------------------------------------------|
|     | 1=Yes (specify)<br>2=No                                                                                                                                              | whatprobbuy<br><br>_____<br><br>_____<br><br>_____ |
| M37 | Do you still have the net that you bought with the voucher?<br>1=yes ( <b>SKIP TO M39</b> )<br>2=No                                                                  | <input type="checkbox"/><br>stillhave              |
| M38 | If not, what happened to it?<br>1=Stolen<br>2=Burnt<br>3=I lost<br>4=I sold<br>5=I gave it to another person<br>6=I sold it to another person<br>7 = Other (explain) | <input type="checkbox"/><br>wherenet<br>otwherenet |
| M39 | Did you sleep under a mosquito net last night?<br>1=yes 2=No ( <b>SKIP TO M42</b> )                                                                                  | <input type="checkbox"/><br>sleptlast              |
| M40 | Have you ever treated this net with insecticide?<br>1 = Yes 2 = No ( <b>SKIP TO M42</b> )                                                                            | <input type="checkbox"/><br>evertreat              |
| M41 | When was the last time you treated the net with insecticide (month/year)? (If don't know write 1 July 2009)                                                          | <input type="text"/> /_____<br>lasttreat           |

Now I would like to ask you some questions about other pregnancies during the past 1 year, i.e. in 2005 and 2006 (**Or check for well-known local event**).

|     |                                                                                                                 |                                       |
|-----|-----------------------------------------------------------------------------------------------------------------|---------------------------------------|
| M42 | Did you give birth to a live child in the past year (in 2005 or 2006)?<br>1=Yes<br>2=No ( <b>SKIP TO C1</b> )   | <input type="checkbox"/><br>livebirth |
| M43 | How many children did you give birth to in 2005 and 2006?                                                       | <input type="text"/><br>numbirths     |
| M44 | Did you give birth to a child that cried or showed signs of life but unfortunately died later?<br>1=yes<br>2=no | <input type="checkbox"/><br>childdied |
| M45 | What is the total number of live children that you gave birth to during the past year?                          | <input type="text"/><br>totlivebirth  |

**Tanzania National Voucher Scheme for insecticide treated nets  
HOUSEHOLD SURVEY**

**Ifakara Health Research and Development Centre *in collaboration with*  
Ministry of Health, Tanzania and London School of Hygiene and Tropical Medicine**

M46 I would like to write down all the names of the children that you gave birth to in 2004 and 2005, even if they died.

**(Start with the youngest one. For twins, write every child in a separate line. If there was a child was not given a name, write "not given" in the name of the child).**

| <i>Number</i> | <i>Name of the child<br/>(start with the youngest)</i> | <i>Born twins?<br/>1 = Lone<br/>2 = Twins</i> | <i>Sex<br/>1=M<br/>2=F</i> | <i>When was s/he born?<br/>(day/month/year)</i> | <i>Is s/he still<br/>alive?<br/>1=Yes<br/>2 = No</i> | <i>If s/he is still<br/>alive, how old<br/>is s/he in<br/>months</i> | <i>If the child died, when did s/he<br/>die??</i> | <i>Have you had any<br/>other children in the<br/>2005 and 2006?<br/>1=Yes 2=No</i> |
|---------------|--------------------------------------------------------|-----------------------------------------------|----------------------------|-------------------------------------------------|------------------------------------------------------|----------------------------------------------------------------------|---------------------------------------------------|-------------------------------------------------------------------------------------|
| _ num1        | Name1                                                  | _ twins1                                      | _ sex1                     | _ _ / _ _ / _ _ _ _ <br>dob1                    | _ <br>alive1                                         | _ _ <br>age1                                                         | _ _ / _ _ / _ _ _ _ <br>whendied1                 | _ <br>otherchild1                                                                   |
| _ num2        | Name2                                                  | _ twins2                                      | _ sex2                     | _ _ / _ _ / _ _ _ _ <br>dob2                    | _ <br>alive2                                         | _ _ <br>age2                                                         | _ _ / _ _ / _ _ _ _ <br>whendied2                 | _ <br>otherchild2                                                                   |
| _ num3        | Name3                                                  | _ twins3                                      | _ sex3                     | _ _ / _ _ / _ _ _ _ <br>dob3                    | _ <br>alive3                                         | _ _ <br>age3                                                         | _ _ / _ _ / _ _ _ _ <br>whendied3                 | _ <br>otherchild3                                                                   |

**Tanzania National Voucher Scheme for insecticide treated nets  
HOUSEHOLD SURVEY**

**Ifakara Health Research and Development Centre *in collaboration with*  
Ministry of Health, Tanzania and London School of Hygiene and Tropical Medicine**  
Now I would like to ask you some questions about your pregnancy with each child born in 2005 and 2006.

|      |                                                                                                                                            | Name (1)<br>_____<br>Child number<br>(from M46)<br><input type="checkbox"/><br><input type="checkbox"/><br>Name1 | Name (2)<br>_____<br>Child number<br>(from M46)<br><input type="checkbox"/><br>name2 | Name (3)<br>_____<br>Child number<br>(from M46)<br><input type="checkbox"/><br>name3 |
|------|--------------------------------------------------------------------------------------------------------------------------------------------|------------------------------------------------------------------------------------------------------------------|--------------------------------------------------------------------------------------|--------------------------------------------------------------------------------------|
| M47  | While you were pregnant with NAME, did you sleep under a mosquito net?<br>1=Yes<br>2=No ( <b>SKIP TO M49</b> )                             | <input type="checkbox"/><br>sleeppg1                                                                             | <input type="checkbox"/><br>sleeppg2                                                 | <input type="checkbox"/><br>sleeppg3                                                 |
| M48  | Had you ever treated this net with insecticide?<br>1=yes<br>2=no                                                                           | <input type="checkbox"/><br>evertreat1                                                                           | <input type="checkbox"/><br>evertreat2                                               | <input type="checkbox"/><br>evertreat3                                               |
| M49  | While you were pregnant with NAME, did you attend an antenatal care clinic?<br>1=Yes<br>2=No ( <b>SKIP TO M75</b> )                        | <input type="checkbox"/><br>attendRCH1                                                                           | <input type="checkbox"/><br>attendRCH2                                               | <input type="checkbox"/><br>attendRCH3                                               |
| M49a | Did you go to a clinic building for RCH services or did you go to outreach services?<br>1= clinic building<br>2= outreach                  | <input type="checkbox"/><br>outreach1                                                                            | <input type="checkbox"/><br>outreach2                                                | <input type="checkbox"/><br>outreach3                                                |
| M50  | How old was your pregnancy at the first visit?<br>(weeks)<br><b>Interviewer: record from RCH card if available</b>                         | <input type="text"/> <input type="text"/><br>gestfirstvis1                                                       | <input type="text"/> <input type="text"/><br>gestfirstvis2                           | <input type="text"/> <input type="text"/><br>gestfirstvis3                           |
| M51  | 1=Gestation recorded from card<br>2=Gestation reported by mother                                                                           | <input type="checkbox"/><br>gestverif1                                                                           | <input type="checkbox"/><br>gestverif2                                               | <input type="checkbox"/><br>gestverif3                                               |
| M52  | When you went to the clinic were you given the medicine to prevent malaria?<br>1= Yes<br>2= No ( <b>GO TO M55</b> )                        |                                                                                                                  |                                                                                      |                                                                                      |
| M53  | Which medicine were you have given to prevent malaria? ( <b>do not prompt</b> )<br>1 = SP /fansidar<br>2= Other medicine<br>9= do not know |                                                                                                                  |                                                                                      |                                                                                      |
| M54  | When you were pregnant, how many doses did you take of that medicine? ( 99 = do not know) ( <b>GO TO M57</b> )                             |                                                                                                                  |                                                                                      |                                                                                      |
| M55  | At the clinic, were you asked if you would like to get SP medicine to prevent Malaria? 1=Yes<br>2=No                                       |                                                                                                                  |                                                                                      |                                                                                      |

**Tanzania National Voucher Scheme for insecticide treated nets  
HOUSEHOLD SURVEY**

**Ifakara Health Research and Development Centre *in collaboration with*  
Ministry of Health, Tanzania and London School of Hygiene and Tropical Medicine**

|     |                                                                                                                                                                                                                                                                                                                                                                                                                            |                                                  |                                                  |                                                  |
|-----|----------------------------------------------------------------------------------------------------------------------------------------------------------------------------------------------------------------------------------------------------------------------------------------------------------------------------------------------------------------------------------------------------------------------------|--------------------------------------------------|--------------------------------------------------|--------------------------------------------------|
| M56 | Why did you not use this medicine<br>1= I don't like<br>2= It can abort the pregnancy<br>3= it causes other problems<br>4= My husband will not agree 5=<br>Other (specify)                                                                                                                                                                                                                                                 |                                                  |                                                  |                                                  |
| M57 | Did an RCH worker give you a discount voucher for buying a mosquito net?<br><b>(Interviewer: show copy of Hati Punguzo)</b><br>1 = Yes<br>2 = No <b>(SKIP TO M75)</b>                                                                                                                                                                                                                                                      | <input type="checkbox"/> recdvouch1              | <input type="checkbox"/> recdvouch2              | <input type="checkbox"/> recdvouch3              |
| M58 | Did you have to pay money to somebody at the RCH clinic to get the voucher?<br>1=Yes<br>2=No <b>(SKIP TO M60)</b>                                                                                                                                                                                                                                                                                                          | <input type="checkbox"/> paidvouch1              | <input type="checkbox"/> paidvouch2              | <input type="checkbox"/> paidvouch3              |
| M59 | How much did you have to pay?                                                                                                                                                                                                                                                                                                                                                                                              | <input type="text"/> paidhowmuch1                | <input type="text"/> paidhowmuch2                | <input type="text"/> paidhowmuch3                |
| M60 | Was the voucher used to buy a net?<br>1=Yes <b>(SKIP TO M63)</b><br>2=No                                                                                                                                                                                                                                                                                                                                                   | <input type="checkbox"/> usevouch1               | <input type="checkbox"/> usevouch2               | <input type="checkbox"/> usevouch3               |
| M61 | Why wasn't the voucher used to buy a net?<br>1 = I gave the voucher to somebody else<br>2 =I already had a net<br>3 =I had no money to buy a net<br>4 = I lost the voucher<br>5 =I bought another commodity<br>6 =I sold the voucher to somebody else<br>7 = The place to buy a net is too far<br>8 =I don't know where to buy a net<br>9 = No shop nearby selling nets<br>10 = Nets too expensive<br>11 = Other (specify) | <input type="checkbox"/> whynotuse1<br>otwhynot1 | <input type="checkbox"/> whynotuse2<br>otwhynot2 | <input type="checkbox"/> whynotuse3<br>otwhynot3 |
| M62 | Do you still have the voucher?<br>1=Yes <b>(SKIP TO M75)</b><br>2=No <b>(SKIP TO M75)</b>                                                                                                                                                                                                                                                                                                                                  | <input type="checkbox"/> havevouch1              | <input type="checkbox"/> havevouch2              | <input type="checkbox"/> havevouch3              |
| M63 | Who went to buy the net?<br>1=Self<br>2=Husband<br>3=Relative<br>4=Friend<br>5=Other                                                                                                                                                                                                                                                                                                                                       |                                                  |                                                  |                                                  |
| M64 | When in the course of your pregnancy was the voucher used to buy the net?<br>1 = While pregnant<br>2 = after delivery                                                                                                                                                                                                                                                                                                      | <input type="checkbox"/> whenbuy1                | <input type="checkbox"/> whenbuy2                | <input type="checkbox"/> whenbuy3                |
| M65 | When was the net bought?<br>(Month/Year)<br><b>If not known, write 1 July 2009</b>                                                                                                                                                                                                                                                                                                                                         | <input type="text"/> datebuy1                    | <input type="text"/> datebuy2                    | <input type="text"/> datebuy3                    |



**Tanzania National Voucher Scheme for insecticide treated nets  
HOUSEHOLD SURVEY**

**Ifakara Health Research and Development Centre *in collaboration with*  
Ministry of Health, Tanzania and London School of Hygiene and Tropical Medicine**

|     |                                                                                                                                                                                                      |                                                                                                                                                          |                                                                                                                                                          |                                                                                                                                                          |
|-----|------------------------------------------------------------------------------------------------------------------------------------------------------------------------------------------------------|----------------------------------------------------------------------------------------------------------------------------------------------------------|----------------------------------------------------------------------------------------------------------------------------------------------------------|----------------------------------------------------------------------------------------------------------------------------------------------------------|
| M66 | Where was the net bought?<br>1=Shop<br>2=Machinga<br>3=Health facility<br>4=Government or NGO project<br>5=Market<br>6=Other (specify)<br>9=Don't know                                               | <input type="checkbox"/><br>wherebuy1<br>otwherebuy1                                                                                                     | <input type="checkbox"/><br>wherebuy2<br>otwherebuy2                                                                                                     | <input type="checkbox"/><br>wherebuy3<br>otwherebuy3                                                                                                     |
| M67 | How long did it take you (or the person who bought the net) to get to the place where you bought the net? (in minutes)<br><b>Write 999 if don't know</b>                                             | <input type="text"/><br>timebuy1                                                                                                                         | <input type="text"/><br>timebuy2                                                                                                                         | <input type="text"/><br>timebuy3                                                                                                                         |
| M68 | How much was paid as transport costs? ( <b>Interviewer: if paid nothing, write 0; Write 9999 if don't know</b> )                                                                                     | <input type="text"/><br>transbuy1                                                                                                                        | <input type="text"/><br>transbuy2                                                                                                                        | <input type="text"/><br>transbuy3                                                                                                                        |
| M69 | What size of net was bought?<br>1=3.5X6<br>2=4X6<br>3=6X6<br>4=Other                                                                                                                                 | <input type="text"/><br>sizenet1<br>otsize1                                                                                                              | <input type="text"/><br>sizenet2<br>otsize2                                                                                                              | <input type="text"/><br>sizenet3<br>otsize3                                                                                                              |
| M70 | How much did you pay to buy the net (after using the discount voucher)?                                                                                                                              | <input type="text"/><br>costnet1                                                                                                                         | <input type="text"/><br>costnet2                                                                                                                         | <input type="text"/><br>costnet3                                                                                                                         |
| M71 | Did you have any other difficulties using the voucher scheme to buy a net?<br>1 = Yes (specify)<br>2 = No                                                                                            | <input type="checkbox"/><br>Probbuy1<br>Whatprob1<br>_____<br>_____<br>_____                                                                             | <input type="checkbox"/><br>probbuy2<br>whatprob2<br>_____<br>_____<br>_____                                                                             | <input type="checkbox"/><br>probbuy3<br>whatprob3<br>_____<br>_____<br>_____                                                                             |
| M72 | Do you still have the net that you bought with the voucher?<br>1=yes ( <b>SKIP TO M74</b> )<br>2=no                                                                                                  | <input type="checkbox"/><br>havenet1                                                                                                                     | <input type="checkbox"/><br>havenet2                                                                                                                     | <input type="checkbox"/><br>havenet3                                                                                                                     |
| M73 | If not: what happened to it?<br>1 =Stolen<br>2 =Burnt<br>3 =I lost<br>4 =I sold<br>5 =I have given to another person<br>6=I sold it to another person<br>7 =Other (explain<br><b>(SKIP TO M75)</b> ) | <input type="checkbox"/><br>wherenet1<br>otwherenet1                                                                                                     | <input type="checkbox"/><br>wherenet2<br>otwherenet2                                                                                                     | <input type="checkbox"/><br>wherenet3<br>otwherenet3                                                                                                     |
| M74 | Who sleeps under the net now?<br><b>(refer to line numbers from household roster H14)</b>                                                                                                            | <input type="text"/><br><input type="text"/><br><input type="text"/><br><input type="text"/><br>whosleeps11<br>whosleeps12<br>whosleeps13<br>whosleeps14 | <input type="text"/><br><input type="text"/><br><input type="text"/><br><input type="text"/><br>whosleeps21<br>whosleeps22<br>whosleeps23<br>whosleeps24 | <input type="text"/><br><input type="text"/><br><input type="text"/><br><input type="text"/><br>whosleeps31<br>whosleeps32<br>whosleeps33<br>whosleeps34 |

**Tanzania National Voucher Scheme for insecticide treated nets  
HOUSEHOLD SURVEY**

**Ifakara Health Research and Development Centre *in collaboration with*  
Ministry of Health, Tanzania and London School of Hygiene and Tropical Medicine**

**Module 3: Children under 1 year of age**

*Now I would like to ask you some questions about your infants under 1 year or any children under 1 for whom you are the guardian.*

|    |                    |  |
|----|--------------------|--|
| K1 | Name of respondent |  |
|----|--------------------|--|

|    |                                                                                                  | <i>Name (1)<br/>Id of child</i> | <i>Name (2)<br/>Id of child</i> |
|----|--------------------------------------------------------------------------------------------------|---------------------------------|---------------------------------|
| K2 | Have you taken NAME to the RCH for vaccination?<br>1=Yes<br>2=No                                 |                                 |                                 |
| K3 | May I see the child health card?<br><b>Interviewer record:</b><br>1=Card seen<br>2=Card not seen |                                 |                                 |
| K4 | Did you receive a Hati Punguzo insecticide retreatment kit?<br>1=Yes<br>2=No                     | _                               | _                               |
| K5 | <b>Interviewer: is the IRK recorded on the card?</b><br>1=Yes<br>2=No                            |                                 |                                 |
| K6 | How many times did you receive a kit?                                                            | □                               | _                               |
| K7 | Have you used a Hati Punguzo IRK to treat a net?<br>1=Yes<br>2=No                                |                                 |                                 |

**Tanzania National Voucher Scheme for insecticide treated nets  
HOUSEHOLD SURVEY**

**Ifakara Health Research and Development Centre *in collaboration with*  
Ministry of Health, Tanzania and London School of Hygiene and Tropical Medicine**

**Module 4: Children under 5 years of age**

**Interviewer: Ensure that the respondent is a mother/carer of a child under 5 years. If they have not yet given consent to be interviewed, ask for their consent.**

I would like to ask you some questions about your children under 5 years or any children for whom you are the guardian

|    |                                                                                    |                                         |
|----|------------------------------------------------------------------------------------|-----------------------------------------|
| C1 | Name of respondent                                                                 | nameresp                                |
| C3 | <b>Have you read him/her the consent form?</b><br>1= yes<br>2=no                   | <input type="checkbox"/><br>readconsent |
| C4 | <b>Does the respondent agree?</b><br>1=Yes<br>2=No <b>IF NO END INTERVIEW HERE</b> | <input type="checkbox"/><br>respagree   |

|     |                                                                                                 |                                                                                          |                                                                                          |                                                                                          |                                                                                          |
|-----|-------------------------------------------------------------------------------------------------|------------------------------------------------------------------------------------------|------------------------------------------------------------------------------------------|------------------------------------------------------------------------------------------|------------------------------------------------------------------------------------------|
| C5  |                                                                                                 | NAME (1)<br>Name1                                                                        | NAME (2)<br>Name2                                                                        | NAME (3)<br>Name3                                                                        | NAME (4)<br>Name4                                                                        |
| C7  | How old is NAME?<br>(years)<br><i>If aged less than one year, write "0"</i>                     | <input type="checkbox"/><br>age1                                                         | <input type="checkbox"/><br>age2                                                         | <input type="checkbox"/><br>age3                                                         | <input type="checkbox"/><br>age4                                                         |
| C8  | Did NAME sleep under a mosquito net last night?<br>1 = yes<br>2 = no (END)                      | <input type="checkbox"/><br>sleepnet1                                                    | <input type="checkbox"/><br>sleepnet2                                                    | <input type="checkbox"/><br>sleepnet3                                                    | <input type="checkbox"/><br>sleepnet4                                                    |
| C9  | Has the net NAME slept under ever been treated?<br>1=Yes<br>2=No (END)                          | <input type="checkbox"/><br>evertreat1                                                   | <input type="checkbox"/><br>evertreat2                                                   | <input type="checkbox"/><br>evertreat3                                                   | <input type="checkbox"/><br>evertreat4                                                   |
| C10 | When was the last time the net they slept under was treated?<br>(Month/year) <b>1 July 2009</b> | <input type="checkbox"/> <input type="checkbox"/> <input type="checkbox"/><br>lasttreat1 | <input type="checkbox"/> <input type="checkbox"/> <input type="checkbox"/><br>lasttreat2 | <input type="checkbox"/> <input type="checkbox"/> <input type="checkbox"/><br>lasttreat3 | <input type="checkbox"/> <input type="checkbox"/> <input type="checkbox"/><br>lasttreat4 |

Thank you very much for answering these questions.

*Interviewer: Record the digital position of the household using the GPS*

|     |                                                          |                                                                                                                                                                                                                                                                                                                                                                                                                                                                                                                            |
|-----|----------------------------------------------------------|----------------------------------------------------------------------------------------------------------------------------------------------------------------------------------------------------------------------------------------------------------------------------------------------------------------------------------------------------------------------------------------------------------------------------------------------------------------------------------------------------------------------------|
| H24 | (If <u>no reading available</u> , fill 99.9, 99.9, 9999) | Latitude <input type="checkbox"/> <input type="checkbox"/> <input type="checkbox"/> .<br><input type="checkbox"/> <input type="checkbox"/> <input type="checkbox"/> <input type="checkbox"/> <input type="checkbox"/> <input type="checkbox"/><br>Longitude <input type="checkbox"/> <input type="checkbox"/> <input type="checkbox"/> <input type="checkbox"/> .<br><input type="checkbox"/> <input type="checkbox"/> <input type="checkbox"/> <input type="checkbox"/> <input type="checkbox"/> <input type="checkbox"/> |
|-----|----------------------------------------------------------|----------------------------------------------------------------------------------------------------------------------------------------------------------------------------------------------------------------------------------------------------------------------------------------------------------------------------------------------------------------------------------------------------------------------------------------------------------------------------------------------------------------------------|
