# Supplementary material for: Vouchers for scaling up insecticide-treated nets in Tanzania: Methods for monitoring and evaluation of a national health system intervention
Source: PubMed Central journal article supplement (PMC2442068; doi:10.1186/1471-2458-8-205), 2008-06-10
Supplement: 1471-2458-8-205-S2.pdf [file 1471-2458-8-205-S2.pdf]

**Tanzania National Voucher Scheme for insecticide treated nets  
REPRODUCTIVE AND CHILD HEALTH (RCH) FACILITY SURVEY, JUNE/JULY 2007**

**Ifakara Health Research and Development Centre *in collaboration with*  
Ministry of Health, Tanzania and London School of Hygiene and Tropical Medicine**

**SECTION 1: IDENTIFIERS**

|                                                                                                                                                                      | Variable Code                        |                                                           | Variable Code |
|----------------------------------------------------------------------------------------------------------------------------------------------------------------------|--------------------------------------|-----------------------------------------------------------|---------------|
| Date<br> _ _  /  _ _  /  _ _ _ _                                                                                                                                     | Tarehe<br>Int_date                   | GPS Longitude<br> _ _ _  :  _ _ _ _ _ _ _ _               |               |
| District<br> _ _ _ _                                                                                                                                                 | Wilaya<br>Distcode                   | GPS Latitude<br> _ _ _ _  :  _ _ _ _ _ _ _ _              |               |
| Cluster<br> _ _ _ _                                                                                                                                                  | Cluster05<br>Cluster06<br>Cluster 07 | Facility Ownership  _ <br>(1)Government (2)Mission (3)NGO | Facowner      |
| Facility Type  _ <br>(1)Dispensary (2)Health Centre<br>(3)Hospital                                                                                                   | Factype                              | Interviewers initials                                     |               |
| What is the status of the facility for the Hati Punguzo pregnant women scheme?<br>(1)Not yet started (2)Trained but not distributing yet (3)Trained and distributing | _                                    |                                                           | Hpstatus_preg |
| What is the status of the facility for the Hati Punguzo Infant voucher<br>(1)Not yet started (2)Trained but not distributing yet (3)Trained and distributing         | _                                    |                                                           | HPstatus_inf  |
| What is the status of the facility for the Hati Punguzo Equity voucher<br>(1)Not yet started (2)Trained but not distributing yet (3)Trained and distributing         | _                                    |                                                           | HPstatus_equ  |

**Tanzania National Voucher Scheme for insecticide treated nets  
REPRODUCTIVE AND CHILD HEALTH (RCH) FACILITY SURVEY, JUNE/JULY 2007**

**Ifakara Health Research and Development Centre *in collaboration with*  
Ministry of Health, Tanzania and London School of Hygiene and Tropical Medicine**

**SECTION 2. EQUIPMENT, DRUGS AND VACCINES**

*Walk around the RCH with a member of staff and personally check the availability of the following:*

**Section 2.1 Equipment**

| Q2.1 | Does the facility have the following equipment and materials on the day of survey?                                                                                                                                | (1)Yes<br>(2)No | Variable Code |
|------|-------------------------------------------------------------------------------------------------------------------------------------------------------------------------------------------------------------------|-----------------|---------------|
| a.   | Accessible and working adult scale?                                                                                                                                                                               |                 | Adultscales   |
| b.   | Accessible and working baby scale?                                                                                                                                                                                |                 | childscases   |
| c.   | Working watch or timing device?                                                                                                                                                                                   |                 | Watch         |
| d.   | Supplies to mix ORS, cups and spoons                                                                                                                                                                              |                 | Orscup        |
| e.   | Source of clean running water (eg bucket+plug)                                                                                                                                                                    |                 | Water         |
| f.   | Child vaccination cards/growth monitoring cards                                                                                                                                                                   |                 | Vac_child     |
| g.   | Antenatal cards                                                                                                                                                                                                   |                 | Vac_mama      |
| h.   | Bed for examining pregnant women                                                                                                                                                                                  |                 | Bed           |
| i.   | Fetalscope                                                                                                                                                                                                        |                 | Fetalscope    |
| j.   | Haemoglobin colour scale/Tallquist                                                                                                                                                                                |                 | Tallquist     |
| k.   | Clinsticks for testing sugar                                                                                                                                                                                      |                 | Clinstiks     |
| l.   | Stethoscope                                                                                                                                                                                                       |                 | Stethoscope   |
| m.   | Blood pressure machine                                                                                                                                                                                            |                 | Pressure      |
| n.   | Albusticks                                                                                                                                                                                                        |                 | Albustiks     |
| o.   | Single use needles and syringes for vaccinations                                                                                                                                                                  |                 | Disposable    |
| p.   | Functional sterilizer, cooker or stove                                                                                                                                                                            |                 | Sterilizer    |
| q.   | Functional fridge                                                                                                                                                                                                 |                 | Fridge        |
| r.   | Cold packs and cold boxes                                                                                                                                                                                         |                 | Ice           |
| r1   | Sharps boxes                                                                                                                                                                                                      |                 | Sharp         |
| r2   | Soap                                                                                                                                                                                                              |                 | Soap          |
| r3   | Disposable gloves                                                                                                                                                                                                 |                 | Gloves        |
| s.   | TNVS vouchers for pregnant women <i>If no skip to 2.1t3</i>                                                                                                                                                       |                 | Vouchers_preg |
| t1.  | <i>If TNVS vouchers for pregnant women are present:<br/>How many pregnancy vouchers are there today?</i>                                                                                                          |                 | Numvouch_preg |
| t2   | <i>If TNVS vouchers for pregnant women are not present and the facility has launched HP:<br/>For how many days have you had no pregnancy vouchers?</i>                                                            |                 | Daysnohp_preg |
|      | <i>Questions t3, t4, t5 for all Hati Punguzo infant operating facilities:</i>                                                                                                                                     |                 |               |
| t3   | TNVS vouchers for infants <i>If no skip to 2.1t5</i>                                                                                                                                                              |                 | Vouchers_inf  |
| t4   | <i>If TNVS vouchers infants are present:<br/>How many infant vouchers are there today? (if more than 0 go t6)</i>                                                                                                 |                 | Numvouch_inf  |
| t5   | <i>If TNVS vouchers for infants are not present and the facility has launched HP:<br/>For how many days have you had no infant vouchers?</i>                                                                      |                 | Daysnohp_inf  |
|      | <i>Questions t6, t7, t8 for HP equity voucher operating facilities:</i>                                                                                                                                           |                 |               |
| t6   | TNVS equity vouchers (if "no" go to U)                                                                                                                                                                            |                 | Vouchers_equ  |
| t7   | How many equity vouchers are there today? (if more than 0 go U)                                                                                                                                                   |                 | Numvouch_equ  |
| t8   | For how many days have you had no equity vouchers?                                                                                                                                                                |                 | Daynohp_equ   |
| u.   | Hati Punguzo IRKits                                                                                                                                                                                               |                 | Irkits        |
| v.   | Height stick                                                                                                                                                                                                      |                 | Stick         |
| w.   | Working electricity supply                                                                                                                                                                                        |                 | Umeme         |
| x.   | The last time you needed emergency transport for a patient what transport did you use?<br>(1)Ambulance (2)other official vehicle (3)Public transport<br>(4)Patient's own vehicle (5)Bicycle (6)None was available |                 | Transport     |

**Tanzania National Voucher Scheme for insecticide treated nets  
REPRODUCTIVE AND CHILD HEALTH (RCH) FACILITY SURVEY, JUNE/JULY 2007**

**Ifakara Health Research and Development Centre *in collaboration with*  
Ministry of Health, Tanzania and London School of Hygiene and Tropical Medicine**

**Section 2.2: Current availability of drugs**

*Check the drug stocks. Answer the following questions based on what you see.*

| Q2.2 | Does the facility have the following drugs available on the day of visit? | (1)Yes<br>(2)No | Variable Code |
|------|---------------------------------------------------------------------------|-----------------|---------------|
| a.   | Sulphadoxine Pyrimethamine for IPT                                        |                 | Spstock       |
| b.   | Vitamin A                                                                 |                 | Vitamina      |
| c.   | Ferrous/Folate                                                            |                 | Folate        |
| d.   | Paracetamol                                                               |                 | Paracetamol   |
| e.   | Aspirin                                                                   |                 | Aspirin       |
| f.   | Mebendazol                                                                |                 | mebendazol    |
| f1   | Co-artemether lumifantrine                                                |                 | Coartem       |
| f2   | Anti-retroviral therapy (ART)                                             |                 | Artstock      |

**Section 2.3: Current availability of vaccines**

*Check the vaccine stocks. Answer the following questions based on what you see.*

| Q2.3 | Does the facility have the following vaccines in stock?                               | (1)Yes<br>(2)No | Variable Code |
|------|---------------------------------------------------------------------------------------|-----------------|---------------|
| g.   | BCG vaccine                                                                           |                 | Bcg           |
| h.   | OPV vaccine                                                                           |                 | Opv           |
| i.   | DPT vaccine                                                                           |                 | Dpt           |
| j.   | Measles vaccine                                                                       |                 | Measles       |
| k.   | TT vaccine                                                                            |                 | Tetanus       |
| l.   | Were <i>any</i> (polio) vaccines indicated as unusable by the Visual Vaccine Monitor? |                 | Vvm           |
| m    | Which staff member assisted in this section?                                          |                 |               |

**Section 2.4: Current availability of diagnostics**

| Q2.4 | Which of the following diagnostic methods are available in this clinic for malaria?                                                                                                       |  | Variable Code |
|------|-------------------------------------------------------------------------------------------------------------------------------------------------------------------------------------------|--|---------------|
| n    | Clinical diagnosis available                                                                                                                                                              |  | Clinical_mal  |
| o    | Rapid test for malaria in stock today                                                                                                                                                     |  | Rapid_mal     |
| p    | Functioning microscopy (slides plus microscope plus slide reader)                                                                                                                         |  | Fmicro_mal    |
| q    | Non-functioning microscopy                                                                                                                                                                |  | Nonmicro_mal  |
| r    | No method of diagnosing malaria                                                                                                                                                           |  | Nomethod_mal  |
| s    | Does the facility offer HIV diagnostics?<br>(1)Yes at this clinic (2)Yes at another facility/laboratory (3)No<br><i>If yes (1) go to t. If yes (2) go to W. If no (3) go to Section 3</i> |  | Diagnose_HIV  |
|      | If yes, clinic offers HIV diagnostic facility on site:<br>Do you have the following rapid antibody tests available in clinic today?                                                       |  |               |
| t    | Capillis (1 yes/ 2 no)                                                                                                                                                                    |  | Capillis      |
| u    | SD Bioline (1 yes/ 2 no)                                                                                                                                                                  |  | SD Bioline    |
| v    | Determine (1 yes/ 2 no)                                                                                                                                                                   |  | Determine     |
| w    | How many days does it take to get the results?                                                                                                                                            |  | HIV_days      |

**Tanzania National Voucher Scheme for insecticide treated nets  
REPRODUCTIVE AND CHILD HEALTH (RCH) FACILITY SURVEY, JUNE/JULY 2007**

**Ifakara Health Research and Development Centre *in collaboration with*  
Ministry of Health, Tanzania and London School of Hygiene and Tropical Medicine**

|                                             |  |  |
|---------------------------------------------|--|--|
| If results available on same day write '0'. |  |  |
|---------------------------------------------|--|--|

**SECTION 3 FACILITY SERVICES**

Discuss with the head of facility to determine which services are routinely offered and the health workers who usually have responsibility for specific tasks.

**Section 3.1 Services available**

| Q3.1 |                                                                                                                                                                                                                                                                                   |                 | Variable Code  |
|------|-----------------------------------------------------------------------------------------------------------------------------------------------------------------------------------------------------------------------------------------------------------------------------------|-----------------|----------------|
| a.   | How many days per week is the facility open?                                                                                                                                                                                                                                      |                 | Ser_days       |
|      | What services are routinely offered at this clinic?                                                                                                                                                                                                                               | (1)yes (2)no    |                |
| b.   | Antenatal registration and counselling                                                                                                                                                                                                                                            |                 | Ser_reg        |
| c.   | Vaccination                                                                                                                                                                                                                                                                       |                 | Ser_vac        |
| d.   | VCT for pregnant women                                                                                                                                                                                                                                                            |                 | Ser_vct        |
| d1   | PMTCT (counselling and testing, ARV prophylaxis for mother and newborn, infant feeding and family planning counselling)                                                                                                                                                           |                 | Ser_pmtct      |
| e.   | Family planning                                                                                                                                                                                                                                                                   |                 | Ser_fp         |
| f.   | Child health                                                                                                                                                                                                                                                                      |                 | Ser_child      |
| f1   | Active outpatient clinic (OPD)                                                                                                                                                                                                                                                    |                 | Ser_OPD        |
| f2   | Post-natal care                                                                                                                                                                                                                                                                   |                 | Ser_postnatal  |
| g.   | How many days per week are antenatal health services provided? (write number of days)                                                                                                                                                                                             |                 | Ser_ancdays    |
|      | Note: deleted out g1-g5 - days of week antenatal provided                                                                                                                                                                                                                         |                 |                |
| h.   | How many days per week are health education services provided? (write number of days)                                                                                                                                                                                             |                 | Ser_hedays     |
| h1   | How many days per week are child health services provided? (write number of days)                                                                                                                                                                                                 |                 | Ser_infdays    |
|      | <b>If Trained and distributing HP for pregnant women: (all)</b>                                                                                                                                                                                                                   |                 |                |
| j.   | What was the date when the first HP pregnancy voucher was issued in this clinic? (dd/mm/yy):<br>write 99 if don't know dd                                                                                                                                                         | _ _ / _ _ / _ _ | FacInch_preg   |
|      | <b>If trained and distributing HP for infants:</b>                                                                                                                                                                                                                                |                 |                |
| j1.  | What was the date when the first HP infant voucher was issued in this clinic? (dd/mm/yy):<br>write 99 if don't know dd                                                                                                                                                            | _ _ / _ _ / _ _ | FacInch_inf    |
|      | <b>If trained and distributing HP equity voucher:</b>                                                                                                                                                                                                                             |                 |                |
| j2.  | What was the date when the HP equity voucher was issued in this clinic? (dd/mm/yy):<br>write 99 if don't know dd                                                                                                                                                                  | _ _ / _ _ / _ _ | FacInch_equ    |
| k.   | Does this clinic offer outreach services?<br>(1)Yes for pregnant women only<br>(2)Yes for children only<br>(3)Yes, for both pregnant women and children<br>(4)No <i>If no skip to S. 3.2</i>                                                                                      |                 | Outreach       |
|      | Questions 3.1K1, L, 3.1L1 and 3.1L2 deleted                                                                                                                                                                                                                                       |                 |                |
| m.   | During the last outreach service did you offer the following services? (1)Yes (2)No                                                                                                                                                                                               |                 |                |
| n.   | Distribute IPT                                                                                                                                                                                                                                                                    |                 | Out ipt        |
| o.   | Distribute Hati Punguzo for pregnant women                                                                                                                                                                                                                                        |                 | Out_hppreg     |
| o1   | Distribute Hati Punguzo for infants                                                                                                                                                                                                                                               |                 | Out_hpinf      |
| o2   | Distribute Hati Punguzo equity voucher                                                                                                                                                                                                                                            |                 | Out_hpequ      |
|      | Delete 2006 questions s31p, q, r                                                                                                                                                                                                                                                  |                 |                |
| s.   | Why would you not give a pregnant woman at outreach Hati Punguzo?<br>(1)she can't afford to use the voucher (2)she lives too far from a shop (3)she doesn't want a voucher (4)not enough vouchers in clinic (5)no book to take on outreach (6)other (specify)_____ (7)all receive |                 | Notgivehp_preg |

**Tanzania National Voucher Scheme for insecticide treated nets  
REPRODUCTIVE AND CHILD HEALTH (RCH) FACILITY SURVEY, JUNE/JULY 2007**

**Ifakara Health Research and Development Centre *in collaboration with*  
Ministry of Health, Tanzania and London School of Hygiene and Tropical Medicine**

**Section 3.2 Characteristics of health workers by responsibility**

*Ask the in-charge to tell you the following about the staff at the RCH.*

| Q3.2 |                                               | Prescriber | Nurse | RCH Aide | Medical Attendant | Recorder | VHW   | Other (sp.) | Total |
|------|-----------------------------------------------|------------|-------|----------|-------------------|----------|-------|-------------|-------|
| a.   | No. in RCH facility                           | S32a1      | S32a2 | S32a3    | S32a4             | S32a5    | S32a6 | S32a7       | S32a8 |
| b.   | No. providing antenatal care                  | delete     |       |          |                   |          |       |             |       |
| c.   | No. doing health education                    | delete     |       |          |                   |          |       |             |       |
| d.   | No. providing VCT services                    |            |       |          |                   |          |       |             |       |
| e.   | No. doing registrations                       | delete     |       |          |                   |          |       |             |       |
| f.   | No. providing f/p services                    | delete     |       |          |                   |          |       |             |       |
| g.   | No. providing child services                  | delete     |       |          |                   |          |       |             |       |
| h.   | No. trained in HP- preg                       |            |       |          |                   |          |       |             |       |
| h1   | No trained in HP- child                       |            |       |          |                   |          |       |             |       |
| h2   | No. trained in HP- equity                     |            |       |          |                   |          |       |             |       |
| i.   | How many are working today?                   |            |       |          |                   |          |       |             |       |
| j.   | How many are away on training today?          |            |       |          |                   |          |       |             |       |
| J1.  | How many off sick today?                      |            |       |          |                   |          |       |             |       |
| J2.  | How many on leave today?                      |            |       |          |                   |          |       |             |       |
| J3   | How many away on official clinic work?        |            |       |          |                   |          |       |             |       |
| J4   | How many own a mobile phone?                  |            |       |          |                   |          |       |             |       |
| J5   | How many have a mobile phone with them today? |            |       |          |                   |          |       |             |       |
| k    | Staff member who assisted                     |            |       |          |                   |          |       |             |       |

**Tanzania National Voucher Scheme for insecticide treated nets  
REPRODUCTIVE AND CHILD HEALTH (RCH) FACILITY SURVEY, JUNE/JULY 2007**

**Ifakara Health Research and Development Centre *in collaboration with*  
Ministry of Health, Tanzania and London School of Hygiene and Tropical Medicine**

**Section 3.3 Supervision**

*Ask the In-Charge about supervision visits received over the last six months, plus details about the last visit. If respondent is unsure try looking in the visitors book*

|       |                                                                                                               |                          |               |
|-------|---------------------------------------------------------------------------------------------------------------|--------------------------|---------------|
| Q 3.3 |                                                                                                               |                          | Variable Code |
| a.    | Where you present at the last supervision visit?<br>(1)Yes (2)No                                              |                          | Lastsup       |
| b.    | How many times during the last six months did the facility receive a supervisory visit? <i>(write number)</i> | If 0 skip to Sect 4.     | Numsup        |
|       | Now please think about the last supervision visit.<br>Which supervisors came on the last visit?               | (1)Yes<br>(2)No          |               |
| c.    | DMO                                                                                                           |                          | Sup_dmo       |
| d.    | Other Medical doctor                                                                                          |                          | Sup_dr        |
| e.    | RCH co-ordinator                                                                                              |                          | Sup_rch       |
| f.    | Vaccine official                                                                                              |                          | Sup_inj       |
| g.    | Mfamasia                                                                                                      |                          | Sup_pharm     |
| h.    | Other (specify)_____                                                                                          |                          | Sup_other     |
|       | During the last supervision visit did your supervisors spend time with any service providers to discuss:      | (1)Yes<br>(2)No<br>(3)DK |               |
| i.    | Family planning services                                                                                      |                          | fp_sup        |
| j.    | Vaccinations                                                                                                  |                          | vac_sup       |
| k.    | Health education                                                                                              |                          | he_sup        |
| l.    | Physical examination of antenatal women                                                                       |                          | mama_sup      |
| m.    | Physical examination of children                                                                              |                          | child_sup     |
| n.    | VCT                                                                                                           |                          | vct_sup       |
| o.    | Hati Punguzo                                                                                                  |                          | hp_sup        |
| p.    | Staff member who assisted?                                                                                    |                          |               |

**SECTION 4 FACILITY RECORDS MODULE**

Section 4.1 Ledger (Book 4) – delete 4.1

**Section 4.3 MTUHA (Book 2)**

*Ask to see MTUHA book 2 with records from July 2006 to June 2007. Look for Table 27A and Table 25A. You need to record the number of children under 5 years who were diagnosed with malaria, and total attendees under 5, for each month. If records are not available for any month enter -1.*

Notice here that 2006 these questions ran from s43a to s43af. These are not asked again in 2007. Note this year the questions run from s43ag to are for period July 2006-June 2007.

|     |                |                           |       |                       |        |
|-----|----------------|---------------------------|-------|-----------------------|--------|
| ag. | 2006 JULY      | Malaria cases, children<5 | S43ag | Attendees, children<5 | S43ag1 |
| ah. | 2006 AUGUST    | Malaria cases, children<5 |       | Attendees, children<5 |        |
| ai. | 2006 SEPTEMBER | Malaria cases, children<5 |       | Attendees, children<5 |        |
| aj. | 2006 OCTOBER   | Malaria cases, children<5 |       | Attendees, children<5 |        |
| ak. | 2006 NOVEMBER  | Malaria cases, children<5 |       | Attendees, children<5 |        |
| al. | 2006 DECEMBER  | Malaria cases, children<5 |       | Attendees, children<5 |        |
| am. | 2007 JANUARY   | Malaria cases, children<5 |       | Attendees, children<5 |        |
| an. | 2007 FEBRUARY  | Malaria cases, children<5 |       | Attendees, children<5 |        |
| ao. | 2007 MARCH     | Malaria cases, children<5 |       | Attendees, children<5 |        |
| ap. | 2007 APRIL     | Malaria cases, children<5 |       | Attendees, children<5 |        |
| aq. | 2007 MAY       | Malaria cases, children<5 |       | Attendees, children<5 |        |
| ar. | 2007 JUNE      | Malaria cases, children<5 |       | Attendees, children<5 |        |

**Tanzania National Voucher Scheme for insecticide treated nets  
REPRODUCTIVE AND CHILD HEALTH (RCH) FACILITY SURVEY, JUNE/JULY 2007**

**Ifakara Health Research and Development Centre *in collaboration with*  
Ministry of Health, Tanzania and London School of Hygiene and Tropical Medicine**

**Section 4.2 Antenatal attendees and Hati Punguzo vouchers: MTUHA (Book 6)**

*Ask the health worker assisting you to let you see all the MTUHA book 6 available in the clinic. In some clinics there are separate books for different villages. You first need to find out how many MTUHA book 6 there are. Do they cover the period March to June 2007? Now tell the PDA how many books there are. The PDA will then ask you the following questions FOR EACH of the books separately.*

|      |                                                                                                                                                                                                                                                                                                                      | <20 weeks | >20 weeks | Variable Code |
|------|----------------------------------------------------------------------------------------------------------------------------------------------------------------------------------------------------------------------------------------------------------------------------------------------------------------------|-----------|-----------|---------------|
| Q4.2 | <b>In June:</b>                                                                                                                                                                                                                                                                                                      |           |           |               |
| a.   | What is the total number of visits to the facility for antenatal?                                                                                                                                                                                                                                                    | S42a1     | S42a2     |               |
| b.   | How many of these antenatal attendees received a voucher?                                                                                                                                                                                                                                                            | S42b1     | S42b2     |               |
| c.   | How many of these antenatal attendees received IPTp 1?                                                                                                                                                                                                                                                               | S42c1     | S42c2     |               |
|      | d and e deleted for 2007                                                                                                                                                                                                                                                                                             |           |           |               |
|      | <b>In May:</b>                                                                                                                                                                                                                                                                                                       |           |           |               |
| f.   | What is the total number of visits to the facility for antenatal?                                                                                                                                                                                                                                                    |           |           |               |
| g.   | How many of these antenatal attendees received a voucher?                                                                                                                                                                                                                                                            |           |           |               |
| h.   | How many of these antenatal attendees received IPTp 1?                                                                                                                                                                                                                                                               |           |           |               |
|      | i and j deleted for 2007                                                                                                                                                                                                                                                                                             |           |           |               |
|      | <b>In April:</b>                                                                                                                                                                                                                                                                                                     |           |           |               |
| k.   | What is the total number of visits to the facility for antenatal?                                                                                                                                                                                                                                                    |           |           |               |
| l.   | How many of these antenatal attendees received a voucher?                                                                                                                                                                                                                                                            |           |           |               |
| m.   | How many of these antenatal attendees received IPTp 1?                                                                                                                                                                                                                                                               |           |           |               |
|      | n and o deleted for 2007                                                                                                                                                                                                                                                                                             |           |           |               |
|      | <b>In March:</b>                                                                                                                                                                                                                                                                                                     |           |           |               |
| p.   | What is the total number of visits to the facility for antenatal?                                                                                                                                                                                                                                                    |           |           |               |
| q.   | How many of these antenatal attendees received a voucher?                                                                                                                                                                                                                                                            |           |           |               |
| r.   | How many of these antenatal attendees received IPTp1?                                                                                                                                                                                                                                                                |           |           |               |
|      | s and t deleted for 2007                                                                                                                                                                                                                                                                                             |           |           |               |
| u.   | Which member of staff assisted?                                                                                                                                                                                                                                                                                      |           |           |               |
| v.   | <i>Ask the member of staff who gives out Hati Punguzo</i><br>Why do you sometimes not give a pregnant woman a voucher? (write response)<br>(1)She still can't afford to buy a net (2)She lives too far from the shops (3)She does not need it because she already has a net (4)Other (specify)_____ (5)all are given |           |           | notgivehp_cli |

**Section 4.4 Hati Punguzo equity voucher**

*Ask to see the Hati Punguzo equity voucher register for pregnant women and carers of infants who have received a equity voucher since March 2007.*

|    |                                                                               |  |              |
|----|-------------------------------------------------------------------------------|--|--------------|
| a. | How many equity vouchers were given out in <b>June</b> ?                      |  | Equjune      |
| b. | How many pregnant women received an equity voucher in June?                   |  | Equjune_preg |
| c. | How many carers of infants received an equity voucher in June?                |  | Equjune_inf  |
| d. | How many equity vouchers were given out in <b>May</b> ?                       |  | Equmay       |
| e. | How many pregnant women received an equity voucher in May?                    |  | Equmay_preg  |
| f. | How many carers of infants received an equity voucher in May?                 |  | Equmay_inf   |
| g. | How many equity vouchers were given out in <b>April</b> ?                     |  | Equapr       |
| h. | How many pregnant women received an equity voucher in April?                  |  | Equapr_preg  |
| i. | How many carers of infants received an equity voucher in April?               |  | Equapr_inf   |
| j. | How many equity vouchers were given out in <b>March</b> ?                     |  | Equmar       |
| k. | How many pregnant women received an equity voucher in March?                  |  | Equmar_preg  |
| l. | How many carers of infants received an equity voucher in March?               |  | Equmar_inf   |
| m. | What is the most difficult thing about the equity voucher? (specify)<br>_____ |  | Problem_equ  |

**Tanzania National Voucher Scheme for insecticide treated nets  
REPRODUCTIVE AND CHILD HEALTH (RCH) FACILITY SURVEY, JUNE/JULY 2007**

**Ifakara Health Research and Development Centre *in collaboration with*  
Ministry of Health, Tanzania and London School of Hygiene and Tropical Medicine**

**Section 4.5 Infants attending for measles and Hati Punguzo for infants: MTUHA (Book 6)**

*Ask the health worker assisting you to let you see all the MTUHA book 6 available in the clinic where measles vaccinations and Hati Punguzo for infants is recorded for the last 4 months. In some clinics there are separate books for different villages. You first need to find out how many MTUHA book 6 there are. Do they cover the period March to June 2007? Now tell the PDA how many books there are. The PDA will then ask you the following questions FOR EACH.*

|      |                                                                                                                                                                                                                                                                                                                                                   |  | Variable Code |
|------|---------------------------------------------------------------------------------------------------------------------------------------------------------------------------------------------------------------------------------------------------------------------------------------------------------------------------------------------------|--|---------------|
| Q4.5 | <b>In June:</b>                                                                                                                                                                                                                                                                                                                                   |  |               |
| a.   | What is the total number of infant visits to the health facility for measles vaccinations?                                                                                                                                                                                                                                                        |  | Infjune       |
| b.   | How many of these infants received an infant voucher?                                                                                                                                                                                                                                                                                             |  | Infjune_hp    |
|      | <b>In May:</b>                                                                                                                                                                                                                                                                                                                                    |  |               |
| c.   | What is the total number of infant visits to the health facility for measles vaccinations?                                                                                                                                                                                                                                                        |  | Infmay        |
| d.   | How many of these infants received an infant voucher?                                                                                                                                                                                                                                                                                             |  | Infmay_hp     |
|      | <b>In April:</b>                                                                                                                                                                                                                                                                                                                                  |  |               |
| e.   | What is the total number of infant visits to the health facility for measles vaccinations?                                                                                                                                                                                                                                                        |  | Infapr        |
| f.   | How many of these infants received an infant voucher?                                                                                                                                                                                                                                                                                             |  | Infapr_hp     |
|      | <b>In March:</b>                                                                                                                                                                                                                                                                                                                                  |  |               |
| g.   | What is the total number of infant visits to the health facility for measles vaccinations?                                                                                                                                                                                                                                                        |  | Infmar        |
| h.   | How many of these infants received an infant voucher?                                                                                                                                                                                                                                                                                             |  | Infmar_hp     |
| i.   | Why would you not give an eligible child Hati Punguzo for infants?<br>(1)the carer can't afford to use the voucher (2)the family lives too far from a shop (3)the carer doesn't want a voucher (4)not enough vouchers in clinic (5)no book for infant vouchers on outreach (6)all eligible children always get a voucher (7)other (specify) _____ |  |               |
| j.   | What is the most difficult thing about the infant voucher? (specify)<br>_____                                                                                                                                                                                                                                                                     |  | Problem_inf   |

**SECTION 5. HEALTH EDUCATION/PROMOTION**

**Section 5.1 Observation of health promotion materials on display**

|      |                                                                                  | (1)Yes<br>(2)No | Variable Code |
|------|----------------------------------------------------------------------------------|-----------------|---------------|
| Q5.1 | On the day of survey were there posters displayed which addressed the following: |                 |               |
| a.   | Hati Punguzo                                                                     |                 | Post_hppreg   |
| b.   | Ngao                                                                             |                 | Post_ngao     |
| c.   | IPT – SP                                                                         |                 | Post_IPT      |
| d.   | STI                                                                              |                 | Post_sti      |
| e.   | Nutrition                                                                        |                 | Post_nut      |
| f.   | HIV                                                                              |                 | Post_HIV      |
| g.   | Family Planning                                                                  |                 | Post-fp       |
| h.   | Childhood illnesses (measles, polio, neonatal tetanus)                           |                 | Post_child    |



**Tanzania National Voucher Scheme for insecticide treated nets  
REPRODUCTIVE AND CHILD HEALTH (RCH) FACILITY SURVEY, JUNE/JULY 2007**

**Ifakara Health Research and Development Centre *in collaboration with*  
Ministry of Health, Tanzania and London School of Hygiene and Tropical Medicine**

**Section 5.2: Observation of key messages delivered during health education sessions either with pregnant women or carers of children under 5 or mixed sessions.**

*Ask for permission to observe a health education session – either group or individual. If possible select to observe a group session. For each topic below write down whether it was discussed.*

| Q5.2 |                                                                                                                        |                                                                | Variable Code |
|------|------------------------------------------------------------------------------------------------------------------------|----------------------------------------------------------------|---------------|
| a.   | What type of health education session was observed?<br>(1)Group (2)Individual (3)Did not observe                       | <i>If (1) go to b.<br/>If (2) go to c.<br/>If (3) go to e.</i> | He_observed   |
| b.   | Were the attendees of the group session<br>(1)Pregnant women only (2)Mothers of children <5yrs only (3)Mixed           | <i>Now go to f.</i>                                            | He_attendees  |
| c.   | In the individual session observed:<br>What number visit to the RCH was it for the pregnant woman?                     |                                                                | S52c          |
| d.   | In the individual session observed:<br>Was it the woman's first pregnancy?                                             | <i>Go to F</i>                                                 | He_firstpreg  |
| e.   | Why did you not observe a health education session? (Specify)                                                          | <i>Go to 5.3</i>                                               | S52e          |
|      | <i>Where the following topics discussed in the health education session:</i>                                           | (1)Yes<br>(2)No                                                |               |
| f.   | Aims and Importance of Attendance at RCH<br>(eg services available, timing of visits)                                  |                                                                | He_aims       |
| g.   | Individual birth plan<br>(eg where to deliver, emergencies, finances, transport)                                       |                                                                | He_birthplan  |
| h.   | Breastfeeding                                                                                                          |                                                                | He_feeding    |
| i.   | Nutrition<br>(eg importance in pregnancy, what foods to eat, for the infant)                                           |                                                                | He_nutrition  |
| j.   | Malaria<br>(eg causes, consequences, treatment, ITNs and IPT)                                                          |                                                                | He_malaria    |
| k.   | HIV<br>(eg risk factors, consequences, VCT, ARV)                                                                       |                                                                | He_hiv        |
| l.   | Anaemia<br>(causes, consequences, detection, treatment)                                                                |                                                                | He_anaemia    |
| m.   | Was a specific mention made of Hati Punguzo pregnant vouchers?                                                         |                                                                | He_hppreg     |
| m1   | Was a specific mention made of Hati Punguzo infant vouchers?                                                           |                                                                | He_hpinf      |
| m2   | Was a specific mention made of Hati Punguzo equity vouchers?                                                           |                                                                | He_hpequ      |
| n.   | Was there an explanation of who Hati Punguzo was meant for and who could get one?                                      |                                                                | He_hpelig     |
| o.   | Was there an explanation of the value of Hati Punguzo?                                                                 |                                                                | He_hpvalue    |
| p.   | Were the pregnant women/carers of children told which shops they could use Hati Punguzo to buy a bednet in their area? |                                                                | He_hpshops    |

**Section 6 Observation of actual delivery of interventions – delete, keep only Q6c, total number of pregnant women visits on day of survey**

| Q6  | At which point were the following given to the pregnant woman?<br>(1)Registration (2)Counselling (3)Health education (4)Other (5)Not |                    | Variable Code |
|-----|--------------------------------------------------------------------------------------------------------------------------------------|--------------------|---------------|
| a.  | IPT                                                                                                                                  |                    | Dist_ipt      |
| a.1 | If IPT was 'Other' specify:<br>-----                                                                                                 |                    |               |
| b.  | Hati Punguzo for pregnant women                                                                                                      |                    | Dist_hp       |
| b.1 | If Hati Punguzo was 'Other' specify:<br>-----                                                                                        |                    |               |
| c.  | What was the total number of visits to the health facility for antenatal services by the end of the day of survey?                   | <20 wks    >20 wks |               |

**Tanzania National Voucher Scheme for insecticide treated nets  
REPRODUCTIVE AND CHILD HEALTH (RCH) FACILITY SURVEY, JUNE/JULY 2007**

**Ifakara Health Research and Development Centre *in collaboration with*  
Ministry of Health, Tanzania and London School of Hygiene and Tropical Medicine**
