# Supplementary material for: Vouchers for scaling up insecticide-treated nets in Tanzania: Methods for monitoring and evaluation of a national health system intervention
Source: PubMed Central journal article supplement (PMC2442068; doi:10.1186/1471-2458-8-205), 2008-06-10
Supplement: 1471-2458-8-205-S6.pdf [file 1471-2458-8-205-S6.pdf]

**Tanzania National Voucher Scheme for insecticide treated nets  
RETAIL CENSUS QUESTIONNAIRE 2007/8**

Ifakara Health Research and Development Centre *in collaboration with*  
Ministry of Health, Tanzania and London School of Hygiene and Tropical Medicine

Version 1: 27 Sept 2007

OUTLET CODE [            ]

|           |                                |                     |
|-----------|--------------------------------|---------------------|
|           |                                |                     |
| <b>C1</b> | Interviewer initials           | [    ]              |
| <b>C2</b> | Date of Interview (dd/mm/yyyy) | _ _ / _ _ / _ _ _ _ |
| <b>C3</b> | District name (write)          |                     |
| <b>C4</b> | District code                  | _ _                 |
| <b>C5</b> | Ward Name                      |                     |
| <b>C6</b> | Ward code                      | _ _ _               |
| <b>C7</b> | Name of outlet                 |                     |

|            |                                                                                                                                             |        |
|------------|---------------------------------------------------------------------------------------------------------------------------------------------|--------|
|            |                                                                                                                                             |        |
| <b>C8</b>  | Name of respondent                                                                                                                          |        |
| <b>C9</b>  | Name of shop owner (if different from above)                                                                                                |        |
| <b>C10</b> | Are you the:<br>1 = Shop/kiosk owner<br>2 = Shop/kiosk assistant<br>3 = self- employed<br>4 = Family member<br>5 = Other ( <i>Specify</i> ) | [    ] |
| <b>C11</b> | Do you sell?<br>1= Retail only<br>2 = Wholesale only<br>3 = Wholesale and retail<br>9= Don't know                                           | [    ] |

**C12**  
What goods are on sale in this outlet today?

|                                                                               |        |
|-------------------------------------------------------------------------------|--------|
| <b>INTERVIEWER: Against each item write 1 = Yes, 2 = No or 9 = Don't know</b> |        |
| <b>ITN Products and Drugs</b>                                                 |        |
| Nets (without insecticide)                                                    | [    ] |
| Net kits (net and Insecticide)                                                | [    ] |
| Insecticide - Ngao                                                            | [    ] |
| Other insecticide apart from Ngao, <i>specify</i>                             | [    ] |
| Anti-Malarial Drugs                                                           | [    ] |

**Tanzania National Voucher Scheme for insecticide treated nets  
RETAIL CENSUS QUESTIONNAIRE 2007/8**

**Ifakara Health Research and Development Centre *in collaboration with*  
Ministry of Health, Tanzania and London School of Hygiene and Tropical Medicine**

**Version 1: 27 Sept 2007**

|                                                                   |     |
|-------------------------------------------------------------------|-----|
| Drugs (other than anti-malarial drugs)                            | [ ] |
| Mosquito coil                                                     | [ ] |
| Insecticide sprays (eg Doom)                                      | [ ] |
| Insect repellents                                                 | [ ] |
| <b>Food, Drink and Groceries</b>                                  |     |
| Fresh fruit and vegetables                                        | [ ] |
| Fresh meat                                                        | [ ] |
| Loose food by weight (e.g. maize flour, sugar, beans, dried fish) | [ ] |
| Pre-packaged foods (e.g. packet tea, canned foods, jars of jam)   | [ ] |
| Bottled drinks (e.g. sodas and beer)                              | [ ] |
| Cleaning products (e.g. soap powder, washing soap)                | [ ] |
| Cosmetics                                                         | [ ] |
| <b>Clothing and Textiles</b>                                      |     |
| Ready made clothes                                                | [ ] |
| Rolls of cloth                                                    | [ ] |
| Kanga                                                             | [ ] |
| <i>Kitenge</i>                                                    | [ ] |
| Bags or suit cases                                                | [ ] |
| Bedcovers, blankets or sheets                                     | [ ] |
| Mattresses                                                        | [ ] |
| Sandals (flip flops)                                              | [ ] |

|                                                               |     |
|---------------------------------------------------------------|-----|
| <b>Others</b>                                                 |     |
| General household goods (e.g. plasticware, bowls, pans, pots) | [ ] |
| Hardware (e.g. tools, cement, iron sheeting)                  | [ ] |
| Stationary (e.g. school books, pens, paper)                   | [ ] |
| Watches, clocks, jewellery                                    | [ ] |

**Tanzania National Voucher Scheme for insecticide treated nets  
RETAIL CENSUS QUESTIONNAIRE 2007/8**

**Ifakara Health Research and Development Centre *in collaboration with*  
Ministry of Health, Tanzania and London School of Hygiene and Tropical Medicine**

Version 1: 27 Sept 2007

|                             |     |
|-----------------------------|-----|
| Radio                       | [ ] |
| Umbrella                    | [ ] |
| Vehicle/bicycle spare parts | [ ] |

**ITN and related product sales**

|            |                                                                                                         |     |
|------------|---------------------------------------------------------------------------------------------------------|-----|
| <b>C13</b> | Do you normally sell unbundled mosquito nets?<br>1= Yes<br>2 = No<br>9 = Don't know                     | [ ] |
| <b>C14</b> | Do you normally sell mosquito nets packaged with insecticide?<br>1 = Yes<br>2 = No<br>9 = Don't know    | [ ] |
| <b>C15</b> | Do you normally sell long-lasting treated nets or Magic Power nets? 1= Yes<br>2 = No<br>99 = Don't know | [ ] |
| <b>C16</b> | Do you normally sell insecticide for treating mosquito nets<br>1 = Yes<br>2 = No<br>9 = Don't know      | [ ] |

**INTERVIEWER: If the respondent does not sell any nets or insecticide products, go to C28**

**Questions C17- C27 are for retailers selling ITN products**

|            |                                                                                                                                                                                                                                                                                 |     |
|------------|---------------------------------------------------------------------------------------------------------------------------------------------------------------------------------------------------------------------------------------------------------------------------------|-----|
| <b>C17</b> | How long have you been in the business of selling unbundled nets?<br>1 = Less than 6 months,<br>2 = 6 to 12 months,<br>3 = 1 to 3 years<br>4 = 4 to 6 years<br>5 = More than 7 years<br>8 = Not applicable/ Don't sell these items<br>9 = Don't know                            | [ ] |
| <b>C18</b> | How long have you been in the business of selling net kits?<br>1 = Less than 6 months,<br>2 = 6 to 12 months,<br>3 = 1 to 3 years<br>4 = 4 to 6 years<br>5 = More than 7 years<br>8 = Not applicable/Don't sell these items<br>9 = Don't know                                   | [ ] |
| <b>C19</b> | How long have you been in the business of selling long lasting treated nets or Magic Power nets<br>1 = Less than 6 months<br>2 = 6 to 12 months<br>3 = 1 to 3 years<br>4 = 4 to 6 years<br>5 = More than 7 years<br>8 = Not applicable/Don't sell these items<br>9 = Don't know | [ ] |
| <b>C20</b> | How long have you been in the business of selling insecticide?<br>1 = Less than 6 months<br>2 = 6 to 12 months                                                                                                                                                                  | [ ] |

**Tanzania National Voucher Scheme for insecticide treated nets  
RETAIL CENSUS QUESTIONNAIRE 2007/8**

**Ifakara Health Research and Development Centre *in collaboration with*  
Ministry of Health, Tanzania and London School of Hygiene and Tropical Medicine**

**Version 1: 27 Sept 2007**

|            |                                                                                                                                                                                    |     |
|------------|------------------------------------------------------------------------------------------------------------------------------------------------------------------------------------|-----|
|            | 3 = 1 to 3 years<br>4 = 4 to 6 years<br>5 = More than 7 years<br>8 = Not applicable/Don't sell these items<br>9 = Don't know                                                       |     |
| <b>C21</b> | When do you stock/sell nets?<br>1 = All year round<br>2 = Part of the year<br>3 = On request<br>4 = Other (specify)<br>8 = Not applicable/Don't sell these items<br>9 = Don't know | [ ] |
| <b>C22</b> | Please give the NAME and LOCATION of the supplier of mosquito nets (write here)<br><br><i>Write '99' if not known or '88' if not applicable/don't sell these items</i>             |     |
| <b>C23</b> | Does your net supplier deliver to your outlet?<br>1 = Yes<br>2 = No<br>8 = Not applicable/Don't sell these items<br>9 = Don't know                                                 | [ ] |
| <b>C24</b> | Give the NAME and LOCATION of your supplier of insecticide<br><br><i>Write 99 if not known or '88' if not applicable/don't sell these items</i>                                    |     |
| <b>C25</b> | Does your insecticide supplier deliver to your outlet?<br>1 = Yes<br>2 = No<br>8 = Not applicable/Don't sell these items<br>9 = Don't know                                         | [ ] |

|            |                                                                                                                    |     |
|------------|--------------------------------------------------------------------------------------------------------------------|-----|
| <b>C26</b> | What brand of nets do you have in stock today?<br><i>Against each item write 1 = Yes, 2 = No or 9 = Don't know</i> |     |
|            | nets                                                                                                               | [ ] |
|            | net                                                                                                                | [ ] |
|            | net                                                                                                                | [ ] |
|            | Net                                                                                                                | [ ] |
|            | ABC                                                                                                                | [ ] |
|            | B52                                                                                                                | [ ] |
|            | Motex                                                                                                              | [ ] |
|            | B58                                                                                                                | [ ] |
|            | Olyset                                                                                                             | [ ] |
|            | Other (please specify)                                                                                             | [ ] |

**Tanzania National Voucher Scheme for insecticide treated nets  
RETAIL CENSUS QUESTIONNAIRE 2007/8**

Ifakara Health Research and Development Centre *in collaboration with*  
Ministry of Health, Tanzania and London School of Hygiene and Tropical Medicine

Version 1: 27 Sept 2007

**INTERVIEWER: If answer is 'No' for all brands of net, Go to C31**

**C27 Please tell us more about the prices of bundled net kits (nets plus insecticide) you have in stock today?**

*INTERVIEWER: Here we want you to record the lowest and highest price for each size of net listed below.*

*"Cost price" refers to the price paid by the shop owner to the wholesaler for each net.*

*"Retail price" refers to the price paid by a customer for a net **without** a voucher*

*"Voucher price" refers to the **top-up amount** which is paid by customers who buy a net with a voucher*

Notes:

- It does not matter whether the net is round or square
- Where there is only **one** price for a net size please write the **same** price in the Low and High boxes.
- Where a net size is **not stocked** please write '8888' in the Low and High boxes.
- If any price is **not known** write '9999'.
- **Do not** leave any boxes blank.

| Size (round or square) | Cost price |      | Retail Price |      | Voucher price       |      |                        |      |
|------------------------|------------|------|--------------|------|---------------------|------|------------------------|------|
|                        | Low        | High | Low          | High | Children's vouchers |      | Pregnant women voucher |      |
|                        |            |      |              |      | Low                 | High | Low                    | High |
| 3.5X6X7                |            |      |              |      |                     |      |                        |      |
| 4x6x5                  |            |      |              |      |                     |      |                        |      |
| 4X6X7                  |            |      |              |      |                     |      |                        |      |
| 5X6X7                  |            |      |              |      |                     |      |                        |      |
| 6X6X5                  |            |      |              |      |                     |      |                        |      |
| 6X6X7                  |            |      |              |      |                     |      |                        |      |
| 8X6X7                  |            |      |              |      |                     |      |                        |      |

**INTERVIEWER: Now go to C31**

| Reasons for not selling ITN products (for outlets not currently selling nets) |                                                                                                             |                                              |
|-------------------------------------------------------------------------------|-------------------------------------------------------------------------------------------------------------|----------------------------------------------|
| <b>C28</b>                                                                    | Have you ever sold mosquito nets (bundled or unbundled) in the past?<br>1 = Yes<br>2 = No<br>9 = Don't know | [ ]<br><br>If 'No' or 'Don't know' go to C30 |
| <b>C29</b>                                                                    | Please give reason(s) why you stopped selling                                                               | [ ]<br><br>Go to C31                         |
| <b>C30</b>                                                                    | Please give reason(s) why you have never sold these products.                                               | Go to C31                                    |

**Tanzania National Voucher Scheme for insecticide treated nets  
RETAIL CENSUS QUESTIONNAIRE 2007/8**

**Ifakara Health Research and Development Centre *in collaboration with*  
Ministry of Health, Tanzania and London School of Hygiene and Tropical Medicine**

Version 1: 27 Sept 2007

| Knowledge and involvement in the TNVS |                                                                                                                                                                       |                                                       |
|---------------------------------------|-----------------------------------------------------------------------------------------------------------------------------------------------------------------------|-------------------------------------------------------|
| <b>C31</b>                            | Have you heard of the voucher scheme for ITNs?<br>1 = Yes<br>2 = No<br>9 = Don't know                                                                                 | [ ]<br><br>If 'No' or 'Don't know' skip to C43        |
| <b>C32</b>                            | Do you currently accept vouchers for ITNs<br>1 = Yes<br>2 = No<br>9 = Don't know                                                                                      | [ ]<br><br>If 'No' or 'Don't know' skip to module C40 |
| <b>C33</b>                            | When did you start accepting vouchers?<br>(mm/yyyy)<br><br><i>Write 9 if not known</i>                                                                                | _ _ / _ _ _ _                                         |
| <b>C34</b>                            | How often do you redeem your vouchers?<br>1 = Weekly<br>2 = Every 2 weeks<br>3 = Monthly<br>4 = Other (please specify)<br>5 = Have not yet redeemed<br>9 = Don't know | [ ]                                                   |
| <b>C35</b>                            | How often would you like to redeem your vouchers?<br>1 = Weekly<br>2 = Every 2 weeks<br>3 = Monthly<br>4 = Other (please specify)<br>9 = Don't know                   | [ ]                                                   |

| Tell the respondent that you now want them to think about the <b>last time</b> they redeemed vouchers. If the respondent has not yet redeemed any vouchers skip to C43 |                                                                                                                                                                            |                                                          |
|------------------------------------------------------------------------------------------------------------------------------------------------------------------------|----------------------------------------------------------------------------------------------------------------------------------------------------------------------------|----------------------------------------------------------|
| <b>C36</b>                                                                                                                                                             | When was the last time you redeemed some vouchers?<br>1 = Less than 1 week ago<br>2 = 1-2 weeks ago<br>3 = 2-4 weeks ago<br>4 = More than one month ago<br>99 = Don't know | [ ]                                                      |
| <b>C37</b>                                                                                                                                                             | Approximately how many vouchers did you redeem on this occasion? (write number)<br><br><i>Write 9999 if not known</i>                                                      | [       ]                                                |
| <b>C38</b>                                                                                                                                                             | Is the redemption process satisfactory or not satisfactory?<br>1 = Satisfactory<br>2 = Not satisfactory<br>9 = Don't know/can't say                                        | [ ]<br><br>If 'satisfactory' or 'don't know' skip to C43 |

**Tanzania National Voucher Scheme for insecticide treated nets  
RETAIL CENSUS QUESTIONNAIRE 2007/8**

**Ifakara Health Research and Development Centre *in collaboration with*  
Ministry of Health, Tanzania and London School of Hygiene and Tropical Medicine**

**Version 1: 27 Sept 2007**

|            |                                                                  |                      |
|------------|------------------------------------------------------------------|----------------------|
| <b>C39</b> | If the redemption process is not satisfactory please explain why | <b>Now go to C43</b> |
|------------|------------------------------------------------------------------|----------------------|

|                                                   |  |  |
|---------------------------------------------------|--|--|
| <b>For shops not currently accepting vouchers</b> |  |  |
|---------------------------------------------------|--|--|

|            |                                                                                                     |                                     |
|------------|-----------------------------------------------------------------------------------------------------|-------------------------------------|
| <b>C40</b> | Have you ever accepted vouchers in the past and then stopped?<br>1= Yes<br>2 = No<br>9 = Don't know | [ ]<br><br><b>If 'No' go to C42</b> |
| <b>C41</b> | Why do you not currently accept vouchers?<br><br><i>(write reason here)</i>                         |                                     |
| <b>C42</b> | Would you like to be involved in a voucher scheme in future?<br>1= Yes<br>2 = No<br>99= Don't know  | [ ]                                 |

|                                                       |  |  |
|-------------------------------------------------------|--|--|
| <b>Other outlets selling ITN products in the area</b> |  |  |
|-------------------------------------------------------|--|--|

|            |                                                                                                                   |                                                               |
|------------|-------------------------------------------------------------------------------------------------------------------|---------------------------------------------------------------|
| <b>C43</b> | Do you know of any outlets in your area that sell nets and/or insecticides?<br>1= Yes<br>2 = No<br>9 = Don't know | [ ]<br><br><b>If 'No' or<br/>'don't know' skip to<br/>C45</b> |
| <b>C44</b> | Give their names and physical addresses                                                                           |                                                               |

**Tanzania National Voucher Scheme for insecticide treated nets  
RETAIL CENSUS QUESTIONNAIRE 2007/8**

**Ifakara Health Research and Development Centre *in collaboration with*  
Ministry of Health, Tanzania and London School of Hygiene and Tropical Medicine**

Version 1: 27 Sept 2007

|                                                                                                                                       |                                                                                                                                                                                                                                                                                                                                            |                                                          |
|---------------------------------------------------------------------------------------------------------------------------------------|--------------------------------------------------------------------------------------------------------------------------------------------------------------------------------------------------------------------------------------------------------------------------------------------------------------------------------------------|----------------------------------------------------------|
| Inform the respondent that you are now going to write down details of the shop and check what point of sales materials are on display |                                                                                                                                                                                                                                                                                                                                            |                                                          |
| <b>C45</b>                                                                                                                            | Are point-of-sales materials on display for Nets?<br>1= Yes<br>2 = No                                                                                                                                                                                                                                                                      | [ ]                                                      |
| <b>C46</b>                                                                                                                            | Are point-of-sales materials on display for Ngao?<br>1= Yes<br>2=No                                                                                                                                                                                                                                                                        | [ ]                                                      |
| <b>C47</b>                                                                                                                            | Are point-of-sales materials on display for TNVS?<br>1= Yes<br>2=No                                                                                                                                                                                                                                                                        | [ ]                                                      |
| <b>C48</b>                                                                                                                            | Location of outlet ( <i>Give as much detail as possible</i> )                                                                                                                                                                                                                                                                              | shoploc                                                  |
| <b>C49</b>                                                                                                                            | Write down the GPS co-ordinates of outlet                                                                                                                                                                                                                                                                                                  | E _____ <sup>0</sup> _____<br>S _____ <sup>0</sup> _____ |
| <b>C50</b>                                                                                                                            | Type of outlet<br>1 = Machinga<br>2 = Kiosk/Kibanda<br>3 = Duka<br>4 = Supermarket<br>5 = Pharmacy (Part 1)<br>6 = Duka La Dawa (Baridi – Part 2)<br>7 = Other (please specify)<br>9 = Don't know/can't tell                                                                                                                               | [ ]                                                      |
| <b>C51</b>                                                                                                                            | Status of Interview<br>1 = Interview was completed<br>2 = Outlet is closed temporarily<br><i>(take note to come back later)</i><br>3 = Outlet is closed permanently<br><i>(report to supervisor)</i><br>4 = Respondent is busy<br><i>(make appointment to come at convenient time)</i><br>5 = No cooperation<br>6 = Other <i>(specify)</i> | [ ]                                                      |

**Thank the Respondent**
