# Supplementary material for: Vouchers for scaling up insecticide-treated nets in Tanzania: Methods for monitoring and evaluation of a national health system intervention
Source: BMC Public Health. 2008 Jun 10;8:205. doi: 10.1186/1471-2458-8-205 (PMC2442068; doi:10.1186/1471-2458-8-205)
Supplement: Additional file 8 — Voucher tracking survey, Form 2 (recipient not found). [file 1471-2458-8-205-S8.pdf]

**Tanzania National Voucher Scheme for insecticide-treated nets  
VOUCHER TRACKING SURVEY 2007**

**Ifakara Health Research and Development Centre in collaboration with Ministry of Health,  
Tanzania and London School of Hygiene and Tropical Medicine**  
**QUESTIONNAIRE FOR RECIPIENTS WHO ARE NOT FOUND**  
**(Use Form 1 for the found recipients)**

**A. INFORMATION ABOUT THE VOUCHER**

|      |                                                                                                                                                                      |                      |
|------|----------------------------------------------------------------------------------------------------------------------------------------------------------------------|----------------------|
| A1   | District (write full name of the district)                                                                                                                           | <input type="text"/> |
| A.2  | Type of health facility<br>1= Dispensary<br>2= Health centre<br>3= Hospital                                                                                          | <input type="text"/> |
| A.3  | MEDA records indicated that:<br>3= Voucher has been redeemed<br>2= Stub has been returned but voucher not redeemed<br>3= Stub has been returned and voucher redeemed | <input type="text"/> |
| A.4  | What was available?<br>1= Voucher only<br>2= stub only<br>3= Voucher and stub<br>4= Voucher number only                                                              | <input type="text"/> |
| A.5  | Name of the health facility                                                                                                                                          | <input type="text"/> |
| A.6  | Interviewer initials                                                                                                                                                 | <input type="text"/> |
| A.7  | Voucher number                                                                                                                                                       | <input type="text"/> |
| A.8  | Date written on the voucher                                                                                                                                          | <input type="text"/> |
| A.9  | Name                                                                                                                                                                 | <input type="text"/> |
| A 10 | Ward                                                                                                                                                                 | <input type="text"/> |
| A.11 | Village                                                                                                                                                              | <input type="text"/> |
| A.12 | Ten cell leader/street chairperson                                                                                                                                   | <input type="text"/> |

**B. REASONS FOR MISSING**

|     |                                                                                                                                                                                                                                                                                                                                 |                                          |
|-----|---------------------------------------------------------------------------------------------------------------------------------------------------------------------------------------------------------------------------------------------------------------------------------------------------------------------------------|------------------------------------------|
| B.1 | Did you get the person you were tracking?<br>(1 = Yes 2 = No)                                                                                                                                                                                                                                                                   | <input type="text"/><br>IF YES, FILL PWV |
| B.2 | Reasons for failure to interview the voucher respondent<br>1 = Travelled out of the district<br>2 = Travelled and nobody knows where she is<br>3 = Nobody knows that person but the ten cell leader is known<br>4 = Both the person and the ten cell leader are not known<br>5 = Died<br>6 = Migrated out<br>7 = Other, mention | <input type="text"/><br><b>END</b>       |
